# Supplementary material for: Exploring macroevolutionary links in multi-species planktonic foraminiferal Mg∕Ca and δ 18 O from 15 Ma to recent
Source: Copernicus journal article supplement (doi:10.5194/bg-22-1095-2025), 2025-02-28
Supplement: Supplementary file 1 [file bg-22-1095-2025-supplement.zip]

## Sheet: Sheet1
																																		d18O T; bayfox/Gaskell & Hull (2023)				Mg/Ca T; Gray & Evans (2019) multispecies						outside combined uncertainty?			Mg/Ca T; Gray & Evans (2019) lineage-specific where available, otherwise G. ruber
Position	Target age	site	Hole	Core	Section	Top(cm)	Bot(cm)	Depth(mbsf)	Depth(mcd)	IODP ID	Bottom biohorizon	Estimated age (bioevents calibrated to Lourens et al., 2004 as in Wade et al., 2011)	Top Biohorizon	Estimated age (bioevents calibrated to Lourens et al., 2004 as in Wade et al., 2011)	Interpolated age	Age error +/-	Biozone	species	size min	size max	d13C	d18O	Gdepth	Gtemp	mgca	diagenesis	Site 516	analytical	Offset species 31.05.2024	Offset species to which a species specific calibration is applied	lat	long		-ve 95%	50th percentile	+ve 95%		+ve 95%	+ve 67%	50th percentile	-ve 67%	-ve 95%		(multispecies Mg/Ca)			+ve 95%	+ve 67%	50th percentile
268	15	242	Z	7	6	145	147	411.96		242Z-7R-6-W 145/147 cm	Base F. peripheroacuta	14.24	Base F. praefohsi	13.77	14.005	0.235	M7	Dentoglobigerina altispira	300	355	2.043	-1.64	123.383	27.2796	3.74351	1	0	0	0	0	-15.8442	41.8205		16.88	21.35	25.82		29.5242	28.2461	27.1469	25.9323	24.636		1			NaN	NaN	NaN
264	15	242	Z	7	6	145	147	411.96		242Z-7R-6-W 145/147 cm	Base F. peripheroacuta	14.24	Base F. praefohsi	13.77	14.005	0.235	M7	Dentoglobigerina venezuelana	300	355	1.366	-1.056	205.794	24.4414	3.49992	1	0	0	0	0	-15.8442	41.8205		14.51	18.98	23.45		28.3053	27.0817	26.0614	24.8619	23.4702		1			NaN	NaN	NaN
276	15	242	Z	7	6	145	147	411.96		242Z-7R-6-W 145/147 cm	Base F. peripheroacuta	14.24	Base F. praefohsi	13.77	14.005	0.235	M7	Globigerinoides obliquus	300	355	2.056	-2.224	47.5425	30.0053	5.46958	1	0	0	0	0	-15.8442	41.8205		19.24	23.72	28.19		36.2897	34.6462	33.3145	32.0458	30.5515		1			NaN	NaN	NaN
275	15	242	Z	7	6	145	147	411.96		242Z-7R-6-W 145/147 cm	Base F. peripheroacuta	14.24	Base F. praefohsi	13.77	14.005	0.235	M7	Praeorbulina glomerosa	300	355	1.641	-1.844	96.8904	28.2317	5.04304	0	0	0	1	1	-15.8442	41.8205		17.7	22.18	26.65		34.9174	33.3512	32.0041	30.6899	29.4227		1			21.7539	20.5279	19.5001
247	15	242	Z	7	6	145	147	411.96		242Z-7R-6-W 145/147 cm	Base F. peripheroacuta	14.24	Base F. praefohsi	13.77	14.005	0.235	M7	Paragloborotalia siakensis	250	300	1.379	-1.771	106.37	27.891	3.16739	0	0	0	0	0	-15.8442	41.8205		17.41	21.88	26.35		26.6707	25.5532	24.4282	23.2209	21.9064		0			25.4571	24.1859	23.0176
261	15	242	Z	7	6	145	147	411.96		242Z-7R-6-W 145/147 cm	Base F. peripheroacuta	14.24	Base F. praefohsi	13.77	14.005	0.235	M7	Sphaeroidinellopsis kochi	300	355	2.36	-2.279	40.4	30.262	3.29014	0	0	0	0	0	-15.8442	41.8205		19.47	23.94	28.41		27.2407	26.0725	25.0179	23.8647	22.58		0			NaN	NaN	NaN
273	15	242	Z	7	6	145	147	411.96		242Z-7R-6-W 145/147 cm	Base F. peripheroacuta	14.24	Base F. praefohsi	13.77	14.005	0.235	M7	Trilobatus trilobus	300	355	2.689	-1.049	206.787	24.4073	4.62179	1	0	0	0	0	-15.8442	41.8205		14.48	18.95	23.42		33.2812	31.8071	30.5854	29.3919	28.0194		1			NaN	NaN	NaN
256	15	516	Z	17	4	0	2	73		516Z-17H-4-W 0/2 cm	Base F. peripheroacuta	14.24	Base F. praefohsi	13.77	14.005	0.235	M7	Dentoglobigerina venezuelana	300	355	2.4	0.19	85.3361	24.3616	2.40121	0	1	0	0	0	-30.2765	-35.2853		9.07	13.55	18.02		22.2265	20.9888	19.8541	18.5623	17.018		1			NaN	NaN	NaN
269	15	516	Z	17	4	0	2	73		516Z-17H-4-W 0/2 cm	Base F. peripheroacuta	14.24	Base F. praefohsi	13.77	14.005	0.235	M7	Globigerina bulloides	300	355	2.143	0.935	192.295	20.3919	3.95393	0	0	0	1	0	-30.2765	-35.2853		6.05	10.53	15		30.4539	29.174	28.0582	26.8938	25.6712		1			NaN	NaN	NaN
259	15	516	Z	17	4	0	2	73		516Z-17H-4-W 0/2 cm	Base F. peripheroacuta	14.24	Base F. praefohsi	13.77	14.005	0.235	M7	Globoquadrina dehiscens	300	355	1.869	0.295	102.683	23.8241	2.76878	0	1	0	0	0	-30.2765	-35.2853		8.65	13.12	17.59		24.5367	23.2661	22.2363	21.0325	19.7317		1			NaN	NaN	NaN
254	15	516	Z	17	4	0	2	73		516Z-17H-4-W 0/2 cm	Base F. peripheroacuta	14.24	Base F. praefohsi	13.77	14.005	0.235	M7	Globoconella miozea	300	355	2.235	0.79	173.118	21.1804	1.8512	0	0	0	0	0	-30.2765	-35.2853		6.64	11.11	15.59		18.2697	16.8226	15.6274	14.1846	12.4156		0			NaN	NaN	NaN
257	15	516	Z	17	4	0	2	73		516Z-17H-4-W 0/2 cm	Base F. peripheroacuta	14.24	Base F. praefohsi	13.77	14.005	0.235	M7	Menardella archaeomenardii	300	355	2.111	0.778	171.531	21.2457	2.48144	0	1	0	0	0	-30.2765	-35.2853		6.69	11.16	15.64		22.6796	21.5561	20.413	19.1779	17.6582		1			NaN	NaN	NaN
255	15	516	Z	17	4	0	2	73		516Z-17H-4-W 0/2 cm	Base F. peripheroacuta	14.24	Base F. praefohsi	13.77	14.005	0.235	M7	Sphaeroidinellopsis seminulina	300	355	2.41	0.317	106.317	23.7115	2.11035	0	0	0	0	0	-30.2765	-35.2853		8.56	13.03	17.5		20.3392	18.9173	17.7612	16.4697	14.7061		0			NaN	NaN	NaN
271	15	516	Z	17	4	0	2	73		516Z-17H-4-W 0/2 cm	Base F. peripheroacuta	14.24	Base F. praefohsi	13.77	14.005	0.235	M7	Trilobatus trilobus	300	355	2.583	0.183	84.1796	24.3974	4.43932	0	1	0	0	0	-30.2765	-35.2853		9.1	13.58	18.05		32.4756	31.1205	29.8865	28.6706	27.4454		1			NaN	NaN	NaN
265	15	871	A	8	1	0	1	64.5	64.5	871A-8H-1-W 0/1 cm	Base F. peripheroacuta	14.24	Base F. praefohsi	13.77	14.005	0.235	M7	Dentoglobigerina altispira	300	355	2.83	-2.239	85.3491	27.0738	3.51087	0	0	0	0	0	5.5572	172.344		19.58	24.05	28.52		28.5085	27.2032	26.1112	24.988	23.6204		0			27.2065	25.8233	24.7031
266	15	871	A	8	1	0	1	64.5	64.5	871A-8H-1-W 0/1 cm	Base F. peripheroacuta	14.24	Base F. praefohsi	13.77	14.005	0.235	M7	Dentoglobigerina baroemoenensis	300	355	3.033	-2.028	103.143	25.9629	3.55616	0	0	0	0	0	5.5572	172.344		18.72	23.19	27.66		28.7457	27.3682	26.2425	25.1264	23.9331		0			27.4292	26.0954	24.8943
262	15	871	A	8	1	0	1	64.5	64.5	871A-8H-1-W 0/1 cm	Base F. peripheroacuta	14.24	Base F. praefohsi	13.77	14.005	0.235	M7	Dentoglobigerina venezuelana	300	355	2.514	-1.786	123.552	24.6887	3.41097	0	0	0	0	0	5.5572	172.344		17.74	22.21	26.68		27.8943	26.7184	25.6264	24.4075	23.1208		0			26.6748	25.3605	24.2078
245	15	871	A	8	1	0	1	64.5	64.5	871A-8H-1-W 0/1 cm	Base F. peripheroacuta	14.24	Base F. praefohsi	13.77	14.005	0.235	M7	Fohsella peripheroacuta	250	300	1.974	-2.215	87.3731	26.9474	3.02904	0	0	0	0	0	5.5572	172.344		19.48	23.95	28.42		25.8818	24.7277	23.7058	22.4789	21.1111		0			24.7653	23.4328	22.2973
248	15	871	A	8	1	0	1	64.5	64.5	871A-8H-1-W 0/1 cm	Base F. peripheroacuta	14.24	Base F. praefohsi	13.77	14.005	0.235	M7	Globoquadrina dehiscens	250	300	1.414	-2.218	87.1201	26.9632	3.55775	0	0	0	0	0	5.5572	172.344		19.49	23.96	28.43		28.5884	27.4588	26.3224	25.1697	23.8693		0			27.4846	26.079	24.8141
274	15	871	A	8	1	0	1	64.5	64.5	871A-8H-1-W 0/1 cm	Base F. peripheroacuta	14.24	Base F. praefohsi	13.77	14.005	0.235	M7	Globigerinoides subquadratus	300	355	2.781	-2.523	61.3988	28.569	4.81238	0	0	0	0	0	5.5572	172.344		20.73	25.2	29.67		33.9792	32.4582	31.235	30.0344	28.678		1			32.6879	31.0435	29.8029
243	15	871	A	8	1	0	1	64.5	64.5	871A-8H-1-W 0/1 cm	Base F. peripheroacuta	14.24	Base F. praefohsi	13.77	14.005	0.235	M7	Menardella archaeomenardii	250	300	1.591	-2.04	102.131	26.026	2.82889	0	0	0	0	0	5.5572	172.344		18.77	23.24	27.71		24.9447	23.6158	22.5884	21.3579	20.0303		0			23.6922	22.3208	21.1622
244	15	871	A	8	1	0	1	64.5	64.5	871A-8H-1-W 0/1 cm	Base F. peripheroacuta	14.24	Base F. praefohsi	13.77	14.005	0.235	M7	Paragloborotalia siakensis	250	300	1.944	-2.141	93.6137	26.5578	2.8492	0	0	0	0	0	5.5572	172.344		19.18	23.65	28.12		24.8845	23.7572	22.6916	21.5587	20.1357		0			23.8764	22.4858	21.2632
272	15	871	A	8	1	0	1	64.5	64.5	871A-8H-1-W 0/1 cm	Base F. peripheroacuta	14.24	Base F. praefohsi	13.77	14.005	0.235	M7	Trilobatus trilobus	300	355	3.083	-2.548	59.2904	28.7006	4.52466	0	0	0	0	0	5.5572	172.344		20.83	25.3	29.77		32.8158	31.4987	30.2206	28.9664	27.7265		0			NaN	NaN	NaN
253	15	1138	A	22	1	20	22	198.81		U1138A-22R-1-W 20/22 cm							M9	Globigerina bulloides	300	355	3.25	0.641	40.4	13.052	1.71868	0	0	0	1	0	-53.5517	75.9749		5.82	10.3	14.77		17.166	15.7596	14.3377	12.8403	11.1317		0			NaN	NaN	NaN
250	15	1138	A	22	1	20	22	198.81		U1138A-22R-1-W 20/22 cm							M9	Globoconella miozea	300	355	2.388	1.261	268.872	10.2556	1.19596	0	0	0	0	0	-53.5517	75.9749		3.31	7.78	12.25		11.7019	10.1553	8.35017	6.57865	4.16003		0			11.0249	8.97029	6.98035
251	15	1138	A	22	1	20	22	198.81		U1138A-22R-1-W 20/22 cm							M9	Globoconella miozea	300	355	2.276	1.22	249.906	10.4456	1.19706	0	0	0	0	0	-53.5517	75.9749		3.47	7.95	12.42		11.7544	10.1812	8.38657	6.57165	4.24315		0			10.8901	8.96662	7.08824
252	15	1138	A	22	1	20	22	198.81		U1138A-22R-1-W 20/22 cm							M9	Globoturborotalita woodi	300	355	3.203	0.878	104.949	12.0149	1.56391	0	0	0	0	0	-53.5517	75.9749		4.86	9.33	13.81		15.6252	14.2089	12.7985	11.226	9.36476		0			15.0325	13.0416	11.4821
249	15	1138	A	22	1	20	22	198.81		U1138A-22R-1-W 20/22 cm							M9	Paragloborotalia mayeri	300	355	2.476	1.27	273.035	10.2139	1.1587	0	0	0	0	0	-53.5517	75.9749		3.27	7.74	12.22		11.4348	9.67808	7.86846	5.98622	3.65916		0			10.3046	8.49584	6.44786
260	15	U1338	B	38	4	52	54	344.91	381.99	U1338B-38H-4-W 52/54 cm	Base F. peripheroacuta	14.24	Base F. praefohsi	13.77	14.005	0.235	M7	Dentoglobigerina altispira	300	355	2.498	-0.52	64.4877	26.795	2.95801	1	0	0	0	0	2.50781	-117.97		12.6	17.08	21.55		25.5602	24.3339	23.2765	22.0857	20.9142		1			NaN	NaN	NaN
258	15	U1338	B	38	4	52	54	344.91	381.99	U1338B-38H-4-W 52/54 cm	Base F. peripheroacuta	14.24	Base F. praefohsi	13.77	14.005	0.235	M7	Dentoglobigerina venezuelana	300	355	1.784	0.325	131.797	22.8459	2.50303	1	0	0	0	0	2.50781	-117.97		9.18	13.65	18.12		22.8981	21.6841	20.5509	19.3212	17.8659		1			NaN	NaN	NaN
242	15	U1338	B	38	4	52	54	344.91	381.99	U1338B-38H-4-W 52/54 cm	Base F. peripheroacuta	14.24	Base F. praefohsi	13.77	14.005	0.235	M7	Trilobatus trilobus	250	300	1.756	-0.832	40.4	28.251	2.81565	0	0	0	0	0	2.50781	-117.97		13.87	18.34	22.81		24.7237	23.5791	22.5284	21.3127	19.8414		0			28.9231	27.8402	26.7904
270	15	U1489	C	41	2	22	24	367.96	406.05	U1489C 41-2-22/24 cm	Not enough biohorizons							Dentoglobigerina altispira	300	355	2.144	-0.987	40.4	31.798	4.16697	1	0	0	0	0	2.11962	141.028		14.49	18.96	23.44		31.2653	30.1164	28.9582	27.71	26.3905		1			NaN	NaN	NaN
246	15	U1489	C	41	2	22	24	367.96	406.05	U1489C 41-2-22/24 cm	Not enough biohorizons							Paragloborotalia siakensis	250	300	1.621	-0.749	63.4127	30.5579	3.05098	1	0	0	0	0	2.11962	141.028		13.53	18	22.47		25.9195	24.8723	23.8324	22.6611	21.3914		1			NaN	NaN	NaN
267	15	U1490	B	26	1	45	47	228.46	253.57	U1490B-26F-1-W 45/47 cm	Base F. peripheroacuta	14.24	Base F. praefohsi	13.77	14.005	0.235	M7	Dentoglobigerina altispira	300	355	2.479	-0.485	77.6637	29.4851	3.6304	1	0	0	0	0	5.81582	142.654		12.46	16.94	21.41		28.8965	27.7688	26.6411	25.4736	24.0702		1			NaN	NaN	NaN
263	15	U1490	B	26	1	45	47	228.46	253.57	U1490B-26F-1-W 45/47 cm	Base F. peripheroacuta	14.24	Base F. praefohsi	13.77	14.005	0.235	M7	Sphaeroidinellopsis seminulina	300	355	2.195	-0.003	126.339	26.7382	3.48444	1	0	0	0	0	5.81582	142.654		10.51	14.98	19.45		28.2455	27.0833	25.9394	24.8215	23.5754		1			NaN	NaN	NaN
225	12.5	242	Z	7	6	13	15	410.64		242Z-7R-6-W 13/15 cm	Base F. fohsi	13.41	Top F. fohsi	11.79	12.6	0.81	M9	Dentoglobigerina altispira	300	355	2.071	-1.694	82.397	28.72	3.02145	0	0	0	0	0	-15.8442	41.8205		18.39	22.86	27.33		25.0941	24.0744	23.1218	21.9897	20.8969		0			24.0686	22.9545	22.0007
221	12.5	242	Z	7	6	13	15	410.64		242Z-7R-6-W 13/15 cm	Base F. fohsi	13.41	Top F. fohsi	11.79	12.6	0.81	M9	Dentoglobigerina venezuelana	300	355	1.078	-0.188	292.242	21.5748	2.62089	0	0	0	0	0	-15.8442	41.8205		12.28	16.76	21.23		22.8464	21.7658	20.7713	19.6627	18.243		0			21.8324	20.7089	19.6459
230	12.5	242	Z	7	6	13	15	410.64		242Z-7R-6-W 13/15 cm	Base F. fohsi	13.41	Top F. fohsi	11.79	12.6	0.81	M9	Orbulina suturalis	300	355	1.469	-1.59	98.6944	28.2524	3.4	0	0	0	1	1	-15.8442	41.8205		17.97	22.44	26.91		27.0563	25.9736	25.047	23.9127	22.7393		0			14.38	13.2427	12.0075
211	12.5	242	Z	7	6	13	15	410.64		242Z-7R-6-W 13/15 cm	Base F. fohsi	13.41	Top F. fohsi	11.79	12.6	0.81	M9	Paragloborotalia siakensis	250	300	0.919	-1.513	110.761	27.9062	2.49069	0	0	0	0	0	-15.8442	41.8205		17.66	22.13	26.6		22.0209	20.9557	19.9109	18.7887	17.3308		0			21.113	19.977	18.7525
219	12.5	242	Z	7	6	13	15	410.64		242Z-7R-6-W 13/15 cm	Base F. fohsi	13.41	Top F. fohsi	11.79	12.6	0.81	M9	Sphaeroidinellopsis kochi	300	355	1.424	-0.668	228.902	23.9592	2.46913	0	0	0	0	0	-15.8442	41.8205		14.23	18.7	23.17		21.8558	20.8286	19.7689	18.5735	17.3311		0			NaN	NaN	NaN
218	12.5	242	Z	7	6	13	15	410.64		242Z-7R-6-W 13/15 cm	Base F. fohsi	13.41	Top F. fohsi	11.79	12.6	0.81	M9	Sphaeroidinellopsis seminulina	300	355	1.323	-0.598	238.139	23.6114	2.17842	0	0	0	0	0	-15.8442	41.8205		13.94	18.42	22.89		19.9176	18.8554	17.7073	16.4283	15.053		0			NaN	NaN	NaN
212	12.5	242	Z	7	6	13	15	410.64		242Z-7R-6-W 13/15 cm	Base F. fohsi	13.41	Top F. fohsi	11.79	12.6	0.81	M9	Sphaeroidinellopsis seminulina	250	300	1.114	-0.659	230.089	23.9145	2.58855	0	0	0	0	0	-15.8442	41.8205		14.19	18.67	23.14		22.6068	21.5465	20.5636	19.3614	18.1235		0			NaN	NaN	NaN
213	12.5	242	Z	7	6	13	15	410.64		242Z-7R-6-W 13/15 cm	Base F. fohsi	13.41	Top F. fohsi	11.79	12.6	0.81	M9	Trilobatus trilobus	250	300	1.598	-1.909	48.7054	29.6867	3.19027	0	0	0	0	0	-15.8442	41.8205		19.26	23.73	28.21		26.2475	24.9124	24.0008	22.9107	21.5849		0			28.8531	27.7293	26.8721
227	12.5	871	B	5	1	10	12	34.7	34.7	871B-5H-4-A 10/12 cm	Base F. fohsi	13.41	Top F. fohsi	11.79	12.6	0.81	M9	Dentoglobigerina venezuelana	300	355	2.198	-1.456	69.4212	28.3844	3.13963	0	0	0	0	0	5.5572	172.344		17.73	22.2	26.67		25.7136	24.6798	23.7607	22.6037	21.4539		0			24.7058	23.5825	22.5922
224	12.5	871	B	5	1	10	12	34.7	34.7	871B-5H-4-A 10/12 cm	Base F. fohsi	13.41	Top F. fohsi	11.79	12.6	0.81	M9	Fohsella fohsi	300	355	1.735	-1.377	74.4711	27.9691	2.83707	0	0	0	0	0	5.5572	172.344		17.41	21.88	26.35		24.2119	23.0306	22.0637	20.9347	19.8649		0			23.0755	21.9727	20.9583
223	12.5	871	B	5	1	10	12	34.7	34.7	871B-5H-4-A 10/12 cm	Base F. fohsi	13.41	Top F. fohsi	11.79	12.6	0.81	M9	Fohsella lobata	300	355	1.689	-1.404	72.7452	28.1111	2.78857	0	0	0	0	0	5.5572	172.344		17.51	21.99	26.46		23.8028	22.7817	21.7328	20.5934	19.262		0			22.8882	21.7383	20.6426
214	12.5	871	B	5	1	10	12	34.7	34.7	871B-5H-4-A 10/12 cm	Base F. fohsi	13.41	Top F. fohsi	11.79	12.6	0.81	M9	Globoquadrina dehiscens	250	300	1.136	-1.506	66.225	28.6473	3.34827	0	0	0	0	0	5.5572	172.344		17.93	22.4	26.87		26.7958	25.6883	24.7606	23.6449	22.5255		0			25.6772	24.689	23.65
226	12.5	871	B	5	1	10	12	34.7	34.7	871B-5H-4-A 10/12 cm	Base F. fohsi	13.41	Top F. fohsi	11.79	12.6	0.81	M9	Globigerinoides mitra	300	355	2.858	-1.852	44.1075	30.4661	3.1394	0	0	0	0	0	5.5572	172.344		19.33	23.8	28.27		25.6098	24.7324	23.7094	22.6827	21.4406		0			24.6681	23.5544	22.5767
239	12.5	871	B	5	1	10	12	34.7	34.7	871B-5H-4-A 10/12 cm	Base F. fohsi	13.41	Top F. fohsi	11.79	12.6	0.81	M9	Globigerinella praesiphonifera	300	355	1.329	-1.363	75.366	27.8955	4.38957	0	0	0	1	0	5.5572	172.344		17.35	21.82	26.29		31.5611	30.2821	29.1606	28.1187	26.937		1			NaN	NaN	NaN
240	12.5	871	B	5	1	10	12	34.7	34.7	871B-5H-4-A 10/12 cm	Base F. fohsi	13.41	Top F. fohsi	11.79	12.6	0.81	M9	Globigerinoides subquadratus	300	355	2.603	-1.883	42.1259	30.6291	4.60161	0	0	0	0	0	5.5572	172.344		19.46	23.93	28.4		32.3218	31.0968	29.9398	28.8346	27.583		1			31.1986	29.8599	28.8488
217	12.5	871	B	5	1	10	12	34.7	34.7	871B-5H-4-A 10/12 cm	Base F. fohsi	13.41	Top F. fohsi	11.79	12.6	0.81	M9	Menardella archaeomenardii	300	355	1.222	0.546	312.661	18.1405	1.95309	0	0	0	0	0	5.5572	172.344		9.61	14.08	18.55		18.3021	17.1342	15.9221	14.6478	12.9244		0			17.3884	16.1743	14.7636
241	12.5	871	B	5	1	10	12	34.7	34.7	871B-5H-4-A 10/12 cm	Base F. fohsi	13.41	Top F. fohsi	11.79	12.6	0.81	M9	Orbulina suturalis	300	355	2.797	-1.729	51.9701	29.8195	4.75	0	0	0	1	1	5.5572	172.344		18.83	23.31	27.78		32.7979	31.6374	30.4247	29.3363	28.0517		1			19.3973	18.4833	17.4976
222	12.5	871	B	5	1	10	12	34.7	34.7	871B-5H-4-A 10/12 cm	Base F. fohsi	13.41	Top F. fohsi	11.79	12.6	0.81	M9	Paragloborotalia siakensis	300	355	1.676	-1.424	71.4667	28.2162	2.74083	0	0	0	0	0	5.5572	172.344		17.6	22.07	26.54		23.5227	22.4896	21.4898	20.3662	19.173		0			22.5322	21.3975	20.3785
235	12.5	871	B	5	1	10	12	34.7	34.7	871B-5H-4-A 10/12 cm	Base F. fohsi	13.41	Top F. fohsi	11.79	12.6	0.81	M9	Trilobatus trilobus	300	355	2.901	-1.91	40.4	30.771	3.7764	0	0	0	0	0	5.5572	172.344		19.57	24.04	28.51		28.8042	27.7166	26.759	25.7007	24.4966		0			31.8414	30.5921	29.598
220	12.5	U1338	B	32	3	67	69	286.58	317.2	U1338B-32H-3-W 67/69 cm	Base F. fohsi	13.41	Top F. fohsi	11.79	12.6	0.81	M9	Dentoglobigerina venezuelana	300	355	0.981	0.618	121.507	23.523	2.58904	1	0	0	0	0	2.50781	-117.97		9.31	13.78	18.26		22.7626	21.5221	20.5857	19.4786	18.1684		1			NaN	NaN	NaN
232	12.5	U1489	C	38	3	25	27	340.36	375.42	U1489C 38-3-25/27 cm	Base F. fohsi	13.41	Top F. fohsi	11.79	12.6	0.81	M9	Dentoglobigerina altispira	300	355	2.02	-0.884	47.9256	32.7605	3.62897	1	0	0	0	0	2.11962	141.028		15.39	19.86	24.33		28.2953	27.0706	26.0838	24.9783	23.7564		1			NaN	NaN	NaN
228	12.5	U1489	C	38	3	25	27	340.36	375.42	U1489C 38-3-25/27 cm	Base F. fohsi	13.41	Top F. fohsi	11.79	12.6	0.81	M9	Fohsella fohsi	300	355	1.678	-0.552	65.3975	31.2666	3.16545	1	0	0	0	0	2.11962	141.028		14.04	18.52	22.99		25.7698	24.7819	23.8701	22.7327	21.5533		1			NaN	NaN	NaN
237	12.5	U1489	C	38	3	25	27	340.36	375.42	U1489C 38-3-25/27 cm	Base F. fohsi	13.41	Top F. fohsi	11.79	12.6	0.81	M9	Sphaeroidinellopsis kochi	300	355	2.075	-0.653	60.0823	31.7211	3.85579	1	0	0	0	0	2.11962	141.028		14.45	18.93	23.4		29.106	28.0772	27.1137	26.0381	24.8937		1			NaN	NaN	NaN
233	12.5	U1489	C	38	3	25	27	340.36	375.42	U1489C 38-3-25/27 cm	Base F. fohsi	13.41	Top F. fohsi	11.79	12.6	0.81	M9	Sphaeroidinellopsis seminulina	300	355	1.984	-0.783	53.2408	32.306	3.64949	1	0	0	0	0	2.11962	141.028		14.98	19.45	23.92		28.2095	27.1694	26.1924	25.1154	23.8172		1			NaN	NaN	NaN
231	12.5	U1490	A	23	5	5	7	209.76	233.75	U1490A-23H-5-W 5/7 cm	Base F. fohsi	13.41	Top F. fohsi	11.79	12.6	0.81	M9	Dentoglobigerina altispira	300	355	2.284	-0.684	40.4	31.755	3.42244	1	0	0	0	0	5.81582	142.654		14.6	19.07	23.54		27.1993	26.146	25.0851	24.1233	22.9015		1			NaN	NaN	NaN
229	12.5	U1490	A	23	5	5	7	209.76	233.75	U1490A-23H-5-W 5/7 cm	Base F. fohsi	13.41	Top F. fohsi	11.79	12.6	0.81	M9	Fohsella fohsi	300	355	1.778	0.087	90.9288	28.0818	3.20852	1	0	0	0	0	5.81582	142.654		11.47	15.94	20.41		26.1691	25.0199	24.0775	22.9763	21.7698		1			NaN	NaN	NaN
215	12.5	U1490	A	23	5	5	7	209.76	233.75	U1490A-23H-5-W 5/7 cm	Base F. fohsi	13.41	Top F. fohsi	11.79	12.6	0.81	M9	Globigerinoides subquadratus	250	300	2.01	0.057	88.9627	28.2247	4.3808	1	0	0	0	0	5.81582	142.654		11.59	16.06	20.53		31.3691	30.2081	29.1412	28.0329	26.8113		1			NaN	NaN	NaN
238	12.5	U1490	A	23	5	5	7	209.76	233.75	U1490A-23H-5-W 5/7 cm	Base F. fohsi	13.41	Top F. fohsi	11.79	12.6	0.81	M9	Orbulina suturalis	300	355	2.157	-0.303	65.3695	29.9398	4.28	0	0	0	1	1	5.81582	142.654		13.05	17.52	21.99		30.9464	29.8533	28.7707	27.7333	26.5471		1			17.6898	16.8203	15.7441
236	12.5	U1490	A	23	5	5	7	209.76	233.75	U1490A-23H-5-W 5/7 cm	Base F. fohsi	13.41	Top F. fohsi	11.79	12.6	0.81	M9	Sphaeroidinellopsis kochi	300	355	1.692	-0.181	73.3649	29.3586	3.8401	1	0	0	0	0	5.81582	142.654		12.55	17.03	21.5		29.3213	28.0072	27.0002	25.9166	24.8066		1			NaN	NaN	NaN
234	12.5	U1490	A	23	5	5	7	209.76	233.75	U1490A-23H-5-W 5/7 cm	Base F. fohsi	13.41	Top F. fohsi	11.79	12.6	0.81	M9	Sphaeroidinellopsis seminulina	300	355	1.818	-0.016	84.1785	28.5725	3.69396	1	0	0	0	0	5.81582	142.654		11.89	16.36	20.83		28.4932	27.3161	26.3729	25.2639	24.008		1			NaN	NaN	NaN
216	12.5	U1490	A	23	5	5	7	209.76	233.75	U1490A-23H-5-W 5/7 cm	Base F. fohsi	13.41	Top F. fohsi	11.79	12.6	0.81	M9	Trilobatus trilobus	250	300	2.192	0.077	90.2734	28.1295	4.45022	1	0	0	0	0	5.81582	142.654		11.51	15.98	20.45		31.6939	30.4917	29.4141	28.304	27.099		1			NaN	NaN	NaN
205	10	872	C	5	4	83	85	41.6	41.6	872C-5H-4-W 83/85 cm	Base G. nephentes	11.63	Top P. siakensis	10.46	11.045	0.585	M11	Dentoglobigerina altispira	300	355	2.741	-1.754	70.2487	26.662	3.21979	0	0	0	0	0	10.0975	162.866		18.56	23.03	27.5		26.9201	25.9611	24.9617	23.8656	22.6513		0			26.0522	25.0083	24.0256
202	10	872	C	5	4	83	85	41.6	41.6	872C-5H-4-W 83/85 cm	Base G. nephentes	11.63	Top P. siakensis	10.46	11.045	0.585	M11	Dentoglobigerina venezuelana	300	355	1.112	-0.705	169.67	21.5066	2.85512	0	0	0	0	0	10.0975	162.866		14.31	18.78	23.25		25.0717	23.9349	22.9985	21.8604	20.5431		0			24.0929	22.996	22.0307
208	10	872	C	5	4	83	85	41.6	41.6	872C-5H-4-W 83/85 cm	Base G. nephentes	11.63	Top P. siakensis	10.46	11.045	0.585	M11	Globigerinoides obliquus	300	355	2.639	-2.071	45.9247	28.247	3.63997	0	0	0	0	0	10.0975	162.866		19.85	24.32	28.79		29.0263	28.0181	26.9844	25.9633	24.5302		0			28.1321	26.9315	25.9775
196	10	872	C	5	4	83	85	41.6	41.6	872C-5H-4-W 83/85 cm	Base G. nephentes	11.63	Top P. siakensis	10.46	11.045	0.585	M11	Globigerinella praesiphonifera	250	300	1.456	-0.819	153.767	22.0428	3.0137	0	0	0	1	0	10.0975	162.866		14.77	19.24	23.71		25.9604	24.8388	23.9173	22.7711	21.6759		0			NaN	NaN	NaN
198	10	872	C	5	4	83	85	41.6	41.6	872C-5H-4-W 83/85 cm	Base G. nephentes	11.63	Top P. siakensis	10.46	11.045	0.585	M11	Menardella limbata group	300	355	1.361	-1.177	114.523	23.7771	2.40926	0	0	0	0	0	10.0975	162.866		16.22	20.69	25.16		22.2088	21.2202	20.2278	19.0658	17.5326		0			21.565	20.3441	19.2466
210	10	872	C	5	4	83	85	41.6	41.6	872C-5H-4-W 83/85 cm	Base G. nephentes	11.63	Top P. siakensis	10.46	11.045	0.585	M11	Orbulina suturalis	300	355	2.421	-2.005	50.989	27.917	4.8	0	0	0	1	1	10.0975	162.866		19.58	24.05	28.52		34.2584	32.6366	31.4809	30.3731	29.0876		1			20.1934	19.2782	18.2688
204	10	872	C	5	4	83	85	41.6	41.6	872C-5H-4-W 83/85 cm	Base G. nephentes	11.63	Top P. siakensis	10.46	11.045	0.585	M11	Sphaeroidinellopsis kochi	300	355	2.23	-1.544	86.3624	25.6121	2.99275	0	0	0	0	0	10.0975	162.866		17.71	22.18	26.65		25.8332	24.7506	23.8064	22.6732	21.3789		0			NaN	NaN	NaN
200	10	872	C	5	4	83	85	41.6	41.6	872C-5H-4-W 83/85 cm	Base G. nephentes	11.63	Top P. siakensis	10.46	11.045	0.585	M11	Sphaeroidinellopsis seminulina	300	355	2.199	-1.333	102.553	24.5571	2.75481	0	0	0	0	0	10.0975	162.866		16.85	21.33	25.8		24.4327	23.3554	22.4139	21.2893	20.0401		0			NaN	NaN	NaN
209	10	872	C	5	4	83	85	41.6	41.6	872C-5H-4-W 83/85 cm	Base G. nephentes	11.63	Top P. siakensis	10.46	11.045	0.585	M11	Trilobatus trilobus	300	355	2.547	-2.143	40.4	28.607	3.85485	0	0	0	0	0	10.0975	162.866		20.14	24.61	29.08		30.0952	28.9264	27.9031	26.7999	25.6025		0			32.3321	30.9959	30.0184
197	10	1138	A	16	2	30	32	142.61		U1138A-16R-2-W 30/32 cm							M13a	Globigerina bulloides	300	355	1.577	1.606	40.4	11.221	2.04748	0	0	0	1	0	-53.5517	75.9749		2.9	7.38	11.85		19.7151	18.6752	17.5448	16.2461	14.6219		1			NaN	NaN	NaN
206	10	U1489	C	33	2	104	106	290.02	320.72	U1489C 33-2-104/106 cm	Base G. nephentes	11.63	Top P. siakensis	10.46	11.045	0.585	M11	Dentoglobigerina altispira	300	355	1.592	-1.117	63.1757	29.1038	3.2643	0	0	0	0	0	2.11962	141.028		15.97	20.44	24.91		27.221	26.1781	25.1843	24.1276	22.9264		0			26.2489	25.2005	24.2677
201	10	U1489	C	33	2	104	106	290.02	320.72	U1489C 33-2-104/106 cm	Base G. nephentes	11.63	Top P. siakensis	10.46	11.045	0.585	M11	Menardella limbata	300	355	1.373	-0.67	105.773	26.6046	2.80932	0	0	0	0	0	2.11962	141.028		14.15	18.63	23.1		24.6129	23.7253	22.7752	21.7108	20.3459		0			24.0353	22.8255	21.7682
199	10	U1489	C	33	2	104	106	290.02	320.72	U1489C 33-2-104/106 cm	Base G. nephentes	11.63	Top P. siakensis	10.46	11.045	0.585	M11	Paragloborotalia siakensis	300	355	1.427	-1.261	49.4531	29.9089	2.62206	0	0	0	0	0	2.11962	141.028		16.55	21.02	25.5		23.5988	22.5392	21.6338	20.4422	19.2391		0			22.6963	21.674	20.6252
207	10	U1489	C	33	2	104	106	290.02	320.72	U1489C 33-2-104/106 cm	Base G. nephentes	11.63	Top P. siakensis	10.46	11.045	0.585	M11	Sphaeroidinellopsis kochi	300	355	1.785	-1.298	45.9271	30.1157	3.35622	0	0	0	0	0	2.11962	141.028		16.7	21.17	25.65		27.7395	26.6095	25.7008	24.5166	23.3407		0			NaN	NaN	NaN
203	10	U1489	C	33	2	104	106	290.02	320.72	U1489C 33-2-104/106 cm	Base G. nephentes	11.63	Top P. siakensis	10.46	11.045	0.585	M11	Sphaeroidinellopsis seminulina	300	355	1.715	-1.356	40.4	30.44	2.8775	0	0	0	0	0	2.11962	141.028		16.94	21.41	25.88		25.1347	24.124	23.1136	22.0105	20.8354		0			NaN	NaN	NaN
182	7.5	242	Z	6	3	3	5	311.04		242Z-6R-3-W 3/5 cm	Base G. plesiotumida	8.58	T. lenguaensis	6.13	7.355	1.225	M13b	Dentoglobigerina altispira	300	355	1.444	-1.731	88.5469	27.7597	3.00032	0	0	0	0	0	-15.8442	41.8205		18.57	23.04	27.51		25.4085	24.2281	23.3034	22.2104	20.9195		0			24.4349	23.3297	22.2809
180	7.5	242	Z	6	3	3	5	311.04		242Z-6R-3-W 3/5 cm	Base G. plesiotumida	8.58	T. lenguaensis	6.13	7.355	1.225	M13b	Dentoglobigerina venezuelana	300	355	1.545	-1.117	168.398	24.9819	2.92462	0	0	0	0	0	-15.8442	41.8205		16.07	20.55	25.02		24.8979	23.836	22.8558	21.8093	20.6998		0			23.8954	22.9033	21.8487
169	7.5	242	Z	6	3	3	5	311.04		242Z-6R-3-W 3/5 cm	Base G. plesiotumida	8.58	T. lenguaensis	6.13	7.355	1.225	M13b	Globoturborotalita nepenthes	250	300	0.994	-0.961	188.78	24.2605	3.02887	0	0	0	0	0	-15.8442	41.8205		15.44	19.91	24.39		25.4786	24.4242	23.4243	22.3637	21.2285		0			24.743	23.4712	22.4604
186	7.5	242	Z	6	3	3	5	311.04		242Z-6R-3-W 3/5 cm	Base G. plesiotumida	8.58	T. lenguaensis	6.13	7.355	1.225	M13b	Globigerinoides obliquus	300	355	1.736	-2.079	43.5063	29.2979	3.33517	0	0	0	0	0	-15.8442	41.8205		19.98	24.45	28.92		26.9904	26.009	25.0072	23.9853	22.9155		0			26.0647	25.0269	23.9879
174	7.5	242	Z	6	3	3	5	311.04		242Z-6R-3-W 3/5 cm	Base G. plesiotumida	8.58	T. lenguaensis	6.13	7.355	1.225	M13b	Menardella limbata group	300	355	1.311	-1.114	168.79	24.9681	2.21001	0	0	0	0	0	-15.8442	41.8205		16.06	20.54	25.01		20.5993	19.3504	18.2455	17.1161	15.6978		0			19.7993	18.5304	17.3099
191	7.5	242	Z	6	3	3	5	311.04		242Z-6R-3-W 3/5 cm	Base G. plesiotumida	8.58	T. lenguaensis	6.13	7.355	1.225	M13b	Orbulina suturalis	300	355	2.101	-1.924	63.5675	28.6128	3.77	0	0	0	1	1	-15.8442	41.8205		19.35	23.82	28.29		29.2162	28.0787	27.0291	25.9768	24.8358		0			15.9354	14.9357	13.8006
177	7.5	242	Z	6	3	3	5	311.04		242Z-6R-3-W 3/5 cm	Base G. plesiotumida	8.58	T. lenguaensis	6.13	7.355	1.225	M13b	Sphaeroidinellopsis kochi	300	355	1.592	-1.47	122.327	26.6061	2.81196	0	0	0	0	0	-15.8442	41.8205		17.51	21.98	26.45		24.3827	23.176	22.2115	21.0701	19.9372		0			NaN	NaN	NaN
173	7.5	242	Z	6	3	3	5	311.04		242Z-6R-3-W 3/5 cm	Base G. plesiotumida	8.58	T. lenguaensis	6.13	7.355	1.225	M13b	Sphaeroidinellopsis paenedehiscens	300	355	1.657	-1.414	129.594	26.3554	2.08456	0	0	0	1	0	-15.8442	41.8205		17.28	21.75	26.22		19.7409	18.4414	17.2637	16.0401	14.7284		0			NaN	NaN	NaN
187	7.5	242	Z	6	3	3	5	311.04		242Z-6R-3-W 3/5 cm	Base G. plesiotumida	8.58	T. lenguaensis	6.13	7.355	1.225	M13b	Trilobatus trilobus	300	355	2.224	-1.88	69.2623	28.4183	3.36914	0	0	0	0	0	-15.8442	41.8205		19.17	23.64	28.11		27.1822	26.1603	25.1199	24.1179	22.8447		0			29.2831	28.1809	27.2304
183	7.5	516	Z	14	1	70	72	56		516Z-14H-1-W 70/72 cm	Base G. nephentes	11.63	Base G. tumida	5.72	8.675	2.955	M11-M14	Dentoglobigerina larmeui	300	355	1.102	0.85	185.433	21.7199	3.09255	0	1	0	0	0	-30.2765	-35.2853		7.67	12.15	16.62		25.9612	24.7444	23.7437	22.6864	21.5783		1			NaN	NaN	NaN
170	7.5	516	Z	14	1	70	72	56		516Z-14H-1-W 70/72 cm	Base G. nephentes	11.63	Base G. tumida	5.72	8.675	2.955	M11-M14	Globoconella conoidea	300	355	1.985	1.046	219.584	20.6734	1.91796	0	0	0	0	0	-30.2765	-35.2853		6.88	11.35	15.83		18.4551	17.1014	15.9357	14.6095	13.1609		0			NaN	NaN	NaN
181	7.5	516	Z	14	1	70	72	56		516Z-14H-1-W 70/72 cm	Base G. nephentes	11.63	Base G. tumida	5.72	8.675	2.955	M11-M14	Globoquadrina dehiscens	300	355	1.405	0.767	170.971	22.163	2.94973	0	1	0	0	0	-30.2765	-35.2853		8.01	12.49	16.96		25.0649	23.9359	22.984	21.9324	20.7945		1			NaN	NaN	NaN
178	7.5	516	Z	14	1	70	72	56		516Z-14H-1-W 70/72 cm	Base G. nephentes	11.63	Base G. tumida	5.72	8.675	2.955	M11-M14	Globoturborotalita nepenthes	300	355	1.664	0.588	139.782	23.1187	2.83242	0	1	0	0	0	-30.2765	-35.2853		8.74	13.21	17.68		24.3558	23.3533	22.3465	21.2215	20.0691		1			NaN	NaN	NaN
168	7.5	516	Z	14	1	70	72	56		516Z-14H-1-W 70/72 cm	Base G. nephentes	11.63	Base G. tumida	5.72	8.675	2.955	M11-M14	Globoturborotalita woodi	250	300	1.523	0.588	139.782	23.1187	2.84326	0	1	0	0	0	-30.2765	-35.2853		8.74	13.21	17.68		24.3422	23.3842	22.3919	21.3461	20.1803		1			NaN	NaN	NaN
172	7.5	516	Z	14	1	70	72	56		516Z-14H-1-W 70/72 cm	Base G. nephentes	11.63	Base G. tumida	5.72	8.675	2.955	M11-M14	Orbulina suturalis	300	355	2.023	0.61	143.615	23.0013	2.08	0	0	0	1	1	-30.2765	-35.2853		8.65	13.12	17.59		19.6532	18.4025	17.2614	16.0619	14.484		0			7.38235	5.73699	4.06328
175	7.5	516	Z	14	1	70	72	56		516Z-14H-1-W 70/72 cm	Base G. nephentes	11.63	Base G. tumida	5.72	8.675	2.955	M11-M14	Sphaeroidinellopsis kochi	300	355	1.974	0.284	73.8955	24.6634	2.25308	0	0	0	0	0	-30.2765	-35.2853		9.97	14.44	18.92		20.7742	19.6288	18.5465	17.4358	15.8167		0			NaN	NaN	NaN
171	7.5	516	Z	14	1	70	72	56		516Z-14H-1-W 70/72 cm	Base G. nephentes	11.63	Base G. tumida	5.72	8.675	2.955	M11-M14	Sphaeroidinellopsis seminulina	300	355	2.054	0.447	111.291	23.8477	2.02293	0	0	0	0	0	-30.2765	-35.2853		9.31	13.78	18.26		19.3346	17.9899	16.81	15.5527	14.0097		0			NaN	NaN	NaN
189	7.5	U1482	A	40	1	106	108	355.37	428.93	U1482A 40-1-106/108 cm	Base G. plesiotumida	8.58	Base G. tumida	5.57	7.075	1.505	M13-M14	Dentoglobigerina altispira	300	355	2.128	-2.211	94.5569	27.9737	3.69861	0	0	0	0	0	-15.0552	120.435		20.43	24.9	29.37		28.8158	27.7023	26.7282	25.6293	24.5776		0			27.9217	26.6741	25.6894
194	7.5	U1482	A	40	1	106	108	355.37	428.93	U1482A 40-1-106/108 cm	Base G. plesiotumida	8.58	Base G. tumida	5.57	7.075	1.505	M13-M14	Globigerinoides obliquus	300	355	2.114	-2.508	40.4	29.491	4.77199	0	0	0	0	0	-15.0552	120.435		21.63	26.11	30.58		33.2751	31.9756	30.8319	29.7368	28.6389		0			32.4062	30.9595	29.8681
184	7.5	U1482	A	40	1	106	108	355.37	428.93	U1482A 40-1-106/108 cm	Base G. plesiotumida	8.58	Base G. tumida	5.57	7.075	1.505	M13-M14	Menardella pertenuis	300	355	1.575	-1.673	158.406	25.2477	3.156	0	0	0	0	0	-15.0552	120.435		18.25	22.72	27.19		26.2438	25.104	24.0963	23.031	22.0434		0			25.3334	24.0731	23.0853
195	7.5	U1482	A	40	1	106	108	355.37	428.93	U1482A 40-1-106/108 cm	Base G. plesiotumida	8.58	Base G. tumida	5.57	7.075	1.505	M13-M14	Orbulina universa	300	355	2.599	-2.069	120.45	27.2483	6.83	0	0	0	1	1	-15.0552	120.435		19.85	24.33	28.8		40.2143	38.223	36.6738	35.3061	34.0238		1			25.5137	24.4487	23.4812
192	7.5	U1482	A	40	1	106	108	355.37	428.93	U1482A 40-1-106/108 cm	Base G. plesiotumida	8.58	Base G. tumida	5.57	7.075	1.505	M13-M14	Sphaeroidinellopsis paenedehiscens	300	355	2.067	-2.253	86.8984	28.1883	3.85184	0	0	0	1	0	-15.0552	120.435		20.6	25.07	29.54		29.4855	28.3563	27.3513	26.3222	25.2702		0			NaN	NaN	NaN
193	7.5	U1482	A	40	1	106	108	355.37	428.93	U1482A 40-1-106/108 cm	Base G. plesiotumida	8.58	Base G. tumida	5.57	7.075	1.505	M13-M14	Trilobatus sacculifer	300	355	2.581	-2.449	51.1584	29.1896	4.68833	0	0	0	0	0	-15.0552	120.435		21.4	25.87	30.34		32.9254	31.6966	30.5395	29.4322	28.2433		0			NaN	NaN	NaN
185	7.5	U1489	C	25	4	15	17	226.66	254.19	U1489C 24-4-15/17 cm	Base N. acostaensis	9.83	Base G. tumida	5.57	7.7	2.13	M12-M14	Dentoglobigerina altispira	300	355	2.416	-1.052	67.2236	30.241	3.31836	0	0	0	0	0	2.11962	141.028		16.08	20.55	25.02		27.0677	25.8689	24.8722	23.8654	22.854		0			26.0866	24.8602	23.9115
179	7.5	U1489	C	25	4	15	17	226.66	254.19	U1489C 24-4-15/17 cm	Base N. acostaensis	9.83	Base G. tumida	5.57	7.7	2.13	M12-M14	Menardella pertenuis	300	355	1.74	-0.773	82.0724	29.0249	2.92003	0	0	0	0	0	2.11962	141.028		14.95	19.42	23.89		24.9115	23.8391	22.8386	21.7336	20.5514		0			24.0078	22.8311	21.8239
176	7.5	U1489	C	25	4	15	17	226.66	254.19	U1489C 24-4-15/17 cm	Base N. acostaensis	9.83	Base G. tumida	5.57	7.7	2.13	M12-M14	Sphaeroidinellopsis paenedehiscens	300	355	2.355	-1.556	40.4	32.438	2.64733	0	0	0	1	0	2.11962	141.028		18.12	22.6	27.07		23.283	22.1721	21.2191	20.1019	18.8397		0			NaN	NaN	NaN
190	7.5	U1489	C	25	4	15	17	226.66	254.19	U1489C 24-4-15/17 cm	Base N. acostaensis	9.83	Base G. tumida	5.57	7.7	2.13	M12-M14	Trilobatus trilobus	300	355	2.861	-1.468	45.0835	32.0544	3.7695	0	0	0	0	0	2.11962	141.028		17.77	22.24	26.71		29.2574	28.024	27.0009	25.868	24.8037		0			31.3105	30.0523	29.0865
188	7.5	U1490	C	18	2	45	47	143.46	160.22	U1490C-18H-2-W 45/47 cm	Top S. siakensis	10.46	Base G. plesiotumida	8.58	9.52	0.94	M12-M13a	Dentoglobigerina altispira	300	355	2.07	-0.581	50.8366	31.4579	3.58105	1	0	0	0	0	5.81582	142.654		14.18	18.66	23.13		28.44	27.1498	26.1968	25.1022	23.9486		1			NaN	NaN	NaN
153	4.5	242	Z	3	1	100	102	129.01		242Z-3R-1-W 100/102 cm	Base G. tumida	5.57	Top G. nephentes	4.37	4.97	0.6	PL1	Dentoglobigerina altispira	300	355	1.125	-1.393	125.288	23.8682	3.372	0	0	0	0	0	-15.8442	41.8205		18.3	22.77	27.25		25.5331	24.5455	23.5646	22.5459	21.3108		0			24.5814	23.4781	22.5532
140	4.5	242	Z	3	1	100	102	129.01		242Z-3R-1-W 100/102 cm	Base G. tumida	5.57	Top G. nephentes	4.37	4.97	0.6	PL1	Dentoglobigerina venezuelana	300	355	0.686	-0.957	184.643	21.901	2.92407	0	0	0	0	0	-15.8442	41.8205		16.53	21.01	25.48		23.3498	22.1859	21.252	20.1527	18.7829		0			22.3337	21.2853	20.1972
152	4.5	242	Z	3	1	100	102	129.01		242Z-3R-1-W 100/102 cm	Base G. tumida	5.57	Top G. nephentes	4.37	4.97	0.6	PL1	Globigerinoides extremus	300	355	0.982	-2.044	42.9302	26.7621	3.36759	0	0	0	0	0	-15.8442	41.8205		20.94	25.41	29.89		25.478	24.4891	23.5449	22.4842	21.3528		0			24.4778	23.4565	22.4899
110	4.5	242	Z	3	1	100	102	129.01		242Z-3R-1-W 100/102 cm	Base G. tumida	5.57	Top G. nephentes	4.37	4.97	0.6	PL1	Globoturborotalita nepenthes	250	300	0.393	-1.336	132.888	23.6122	3.42254	0	0	0	0	0	-15.8442	41.8205		18.07	22.54	27.01		25.7272	24.7482	23.8046	22.815	21.6558		0			24.7429	23.7377	22.8131
156	4.5	242	Z	3	1	100	102	129.01		242Z-3R-1-W 100/102 cm	Base G. tumida	5.57	Top G. nephentes	4.37	4.97	0.6	PL1	Globigerinoides obliquus	300	355	1.058	-2.064	40.4	26.851	3.48578	0	0	0	0	0	-15.8442	41.8205		21.02	25.5	29.97		26.1452	25.0377	24.1058	23.0595	21.9662		0			25.247	24.0452	23.0697
118	4.5	242	Z	3	1	100	102	129.01		242Z-3R-1-W 100/102 cm	Base G. tumida	5.57	Top G. nephentes	4.37	4.97	0.6	PL1	Globorotalia tumida	300	355	1.246	-0.798	206.356	21.1831	1.93646	0	0	0	0	0	-15.8442	41.8205		15.89	20.36	24.83		16.9204	15.7115	14.3883	13.119	11.5212		1			16.1946	14.8251	13.4009
138	4.5	242	Z	3	1	100	102	129.01		242Z-3R-1-W 100/102 cm	Base G. tumida	5.57	Top G. nephentes	4.37	4.97	0.6	PL1	Menardella pertenuis	300	355	0.789	-1.553	105.046	24.5795	2.89528	0	0	0	0	0	-15.8442	41.8205		18.95	23.42	27.89		23.0458	22.044	21.053	20.0265	18.7045		0			22.2285	21.0827	20.0402
106	4.5	242	Z	3	1	100	102	129.01		242Z-3R-1-W 100/102 cm	Base G. tumida	5.57	Top G. nephentes	4.37	4.97	0.6	PL1	Neogloboquadrina acostaensis	250	300	0.298	-1.41	123.137	23.9438	2.06954	0	0	0	1	1	-15.8442	41.8205		18.37	22.84	27.31		18.0711	16.7671	15.5275	14.319	12.7334		1			22.4417	20.7634	19.5554
124	4.5	242	Z	3	1	100	102	129.01		242Z-3R-1-W 100/102 cm	Base G. tumida	5.57	Top G. nephentes	4.37	4.97	0.6	PL1	Neogloboquadrina acostaensis	300	355	0.147	-1.574	102.39	24.6728	2.20915	0	0	0	1	1	-15.8442	41.8205		19.04	23.51	27.98		18.8174	17.7859	16.607	15.3413	13.8137		1			23.6667	21.8821	20.5931
107	4.5	242	Z	3	1	100	102	129.01		242Z-3R-1-W 100/102 cm	Base G. tumida	5.57	Top G. nephentes	4.37	4.97	0.6	PL1	Neogloboquadrina humerosa	250	300	0.186	-1.497	112.131	24.3306	2.171	0	0	0	1	1	-15.8442	41.8205		18.72	23.2	27.67		18.639	17.5068	16.3483	15.0804	13.573		1			23.411	21.6451	20.3891
166	4.5	242	Z	3	1	100	102	129.01		242Z-3R-1-W 100/102 cm	Base G. tumida	5.57	Top G. nephentes	4.37	4.97	0.6	PL1	Orbulina universa	300	355	1.555	-1.651	92.6484	25.0151	4.86	0	0	0	1	1	-15.8442	41.8205		19.35	23.82	28.29		31.8218	30.6101	29.5371	28.5194	27.4317		1			18.2854	17.3681	16.3901
121	4.5	242	Z	3	1	100	102	129.01		242Z-3R-1-W 100/102 cm	Base G. tumida	5.57	Top G. nephentes	4.37	4.97	0.6	PL1	Pulleniatina primalis	300	355	0.244	-1.292	138.896	23.4135	2.1362	0	0	0	1	1	-15.8442	41.8205		17.89	22.37	26.84		18.5205	17.2619	16.0758	14.7484	13.3445		1			22.918	21.315	20.0592
117	4.5	242	Z	3	1	100	102	129.01		242Z-3R-1-W 100/102 cm	Base G. tumida	5.57	Top G. nephentes	4.37	4.97	0.6	PL1	Sphaeroidinellopsis kochi	300	355	1.451	-1.263	142.857	23.2826	1.84145	0	0	0	0	0	-15.8442	41.8205		17.77	22.25	26.72		16.2395	14.8756	13.6067	12.1477	10.4348		1			NaN	NaN	NaN
115	4.5	242	Z	3	1	100	102	129.01		242Z-3R-1-W 100/102 cm	Base G. tumida	5.57	Top G. nephentes	4.37	4.97	0.6	PL1	Sphaeroidinellopsis paenedehiscens	300	355	1.093	-0.991	180	22.0545	1.70256	0	0	0	1	0	-15.8442	41.8205		16.67	21.14	25.62		15.143	13.7012	12.3267	10.9085	9.0765		1			NaN	NaN	NaN
143	4.5	242	Z	3	1	100	102	129.01		242Z-3R-1-W 100/102 cm	Base G. tumida	5.57	Top G. nephentes	4.37	4.97	0.6	PL1	Trilobatus sacculifer	300	355	1.777	-1.955	54.1895	26.3665	2.96775	0	0	0	0	0	-15.8442	41.8205		20.58	25.05	29.52		23.4198	22.4574	21.4908	20.4761	19.2039		0			25.7306	24.6654	23.7714
145	4.5	516	Z	8	2	10	12	30.5		516Z-8H-2-W 10/12 cm	Top G. lenguaensis	6.13	Top G. nephentes	4.37	5.25	0.88	PL1	Dentoglobigerina venezuelana	300	355	1.611	0.535	153.401	20.3284	2.98641	0	1	0	0	0	-30.2765	-35.2853		10.04	14.51	18.99		23.5696	22.553	21.57	20.5762	19.2609		1			NaN	NaN	NaN
160	4.5	516	Z	8	2	10	12	30.5		516Z-8H-2-W 10/12 cm	Top G. lenguaensis	6.13	Top G. nephentes	4.37	5.25	0.88	PL1	Globigerinoides extremus	300	355	1.768	0.115	57.8674	22.3911	3.79861	0	1	0	0	0	-30.2765	-35.2853		11.74	16.22	20.69		27.4389	26.4628	25.5386	24.4911	23.3811		1			NaN	NaN	NaN
144	4.5	516	Z	8	2	10	12	30.5		516Z-8H-2-W 10/12 cm	Top G. lenguaensis	6.13	Top G. nephentes	4.37	5.25	0.88	PL1	Globigerinella praesiphonifera	300	355	1.264	1.061	242.601	17.6711	2.97031	0	0	0	1	0	-30.2765	-35.2853		7.91	12.38	16.85		23.4402	22.4921	21.5098	20.4478	19.1715		1			NaN	NaN	NaN
127	4.5	516	Z	8	2	10	12	30.5		516Z-8H-2-W 10/12 cm	Top G. lenguaensis	6.13	Top G. nephentes	4.37	5.25	0.88	PL1	Sphaeroidinellopsis kochi	300	355	1.612	0.539	154.096	20.3081	2.35506	0	0	0	0	0	-30.2765	-35.2853		10.02	14.5	18.97		19.8156	18.7754	17.6951	16.4487	14.958		0			NaN	NaN	NaN
125	4.5	516	Z	8	2	10	12	30.5		516Z-8H-2-W 10/12 cm	Top G. lenguaensis	6.13	Top G. nephentes	4.37	5.25	0.88	PL1	Sphaeroidinellopsis paenedehiscens	300	355	1.685	0.539	154.096	20.3081	2.2508	0	0	0	1	0	-30.2765	-35.2853		10.02	14.5	18.97		19.2024	18.0287	16.9249	15.7064	14.2198		0			NaN	NaN	NaN
112	4.5	516	Z	8	2	10	12	30.5		516Z-8H-2-W 10/12 cm	Top G. lenguaensis	6.13	Top G. nephentes	4.37	5.25	0.88	PL1	Truncorotalia cf. tosaensis	300	355	1.773	1.322	281.782	16.3798	1.386	0	0	0	0	0	-30.2765	-35.2853		6.85	11.32	15.79		12.0189	10.619	8.94331	7.30651	5.11481		0			NaN	NaN	NaN
114	4.5	516	Z	8	2	10	12	30.5		516Z-8H-2-W 10/12 cm	Top G. lenguaensis	6.13	Top G. nephentes	4.37	5.25	0.88	PL1	Truncorotalia crassaformis	300	355	1.783	1.318	281.182	16.3995	1.57174	0	0	0	0	0	-30.2765	-35.2853		6.86	11.34	15.81		13.823	12.519	11.0137	9.49123	7.4831		0			NaN	NaN	NaN
116	4.5	516	Z	8	2	10	12	30.5		516Z-8H-2-W 10/12 cm	Top G. lenguaensis	6.13	Top G. nephentes	4.37	5.25	0.88	PL1	Truncorotalia oceanica	300	355	1.318	1.208	264.669	16.9438	1.82177	0	0	0	0	0	-30.2765	-35.2853		7.31	11.78	16.26		16.1277	14.7355	13.4773	12.0836	10.2963		0			NaN	NaN	NaN
151	4.5	872	C	3	5	116	118	24.54	24.54	872C-3H-5-W 116/118 cm	Base G. tumida	5.57	Top G. nephentes	4.37	4.97	0.6	PL1b	Dentoglobigerina altispira	300	355	1.565	-1.465	74.5119	24.1201	3.24827	0	0	0	0	0	10.0975	162.866		18.88	23.35	27.82		24.8529	23.8785	22.9806	21.9211	20.7989		0			23.9828	22.8427	21.9116
150	4.5	872	C	3	5	116	118	24.54	24.54	872C-3H-5-W 116/118 cm	Base G. tumida	5.57	Top G. nephentes	4.37	4.97	0.6	PL1b	Dentoglobigerina venezuelana	300	355	0.888	-0.638	150.217	20.0601	3.13468	0	0	0	0	0	10.0975	162.866		15.52	19.99	24.46		24.2966	23.3414	22.3637	21.3325	20.1272		0			23.5512	22.3488	21.3506
158	4.5	872	C	3	5	116	118	24.54	24.54	872C-3H-5-W 116/118 cm	Base G. tumida	5.57	Top G. nephentes	4.37	4.97	0.6	PL1b	Globigerinoides extremus	300	355	1.663	-1.907	40.4	26.294	3.5337	0	0	0	0	0	10.0975	162.866		20.67	25.14	29.61		26.3132	25.2384	24.351	23.335	22.1776		0			25.2486	24.2521	23.342
149	4.5	872	C	3	5	116	118	24.54	24.54	872C-3H-5-W 116/118 cm	Base G. tumida	5.57	Top G. nephentes	4.37	4.97	0.6	PL1b	Globigerinoides obliquus	300	355	1.806	-1.873	43.024	26.1268	3.11592	0	0	0	0	0	10.0975	162.866		20.53	25	29.47		24.2766	23.2251	22.2731	21.2891	20.1506		0			23.3379	22.2479	21.286
123	4.5	872	C	3	5	116	118	24.54	24.54	872C-3H-5-W 116/118 cm	Base G. tumida	5.57	Top G. nephentes	4.37	4.97	0.6	PL1b	Globigerinella praesiphonifera	300	355	1.467	-1.148	98.9768	22.5611	2.16986	0	0	0	1	0	10.0975	162.866		17.59	22.06	26.53		18.6554	17.4641	16.3522	15.0964	13.5735		1			NaN	NaN	NaN
131	4.5	872	C	3	5	116	118	24.54	24.54	872C-3H-5-W 116/118 cm	Base G. tumida	5.57	Top G. nephentes	4.37	4.97	0.6	PL1b	Globorotalia tumida	300	355	1.974	-0.03	250.589	17.1292	2.52469	0	0	1	0	0	10.0975	162.866		13.05	17.53	22		20.9921	19.828	18.7913	17.6674	16.3223		0			NaN	NaN	NaN
120	4.5	872	C	3	5	116	118	24.54	24.54	872C-3H-5-W 116/118 cm	Base G. tumida	5.57	Top G. nephentes	4.37	4.97	0.6	PL1b	Neogloboquadrina humerosa	300	355	0.936	-1.366	82.1523	23.6332	2.03295	0	0	0	1	1	10.0975	162.866		18.47	22.95	27.42		17.7878	16.4656	15.2388	13.9793	12.2828		1			21.939	20.416	19.3449
163	4.5	872	C	3	5	116	118	24.54	24.54	872C-3H-5-W 116/118 cm	Base G. tumida	5.57	Top G. nephentes	4.37	4.97	0.6	PL1b	Orbulina universa	300	355	1.361	-1.546	68.2606	24.5185	4.43	0	0	0	1	1	10.0975	162.866		19.2	23.68	28.15		30.2505	29.0524	28.0119	26.9792	25.8559		0			16.9466	15.9619	14.8456
134	4.5	872	C	3	5	116	118	24.54	24.54	872C-3H-5-W 116/118 cm	Base G. tumida	5.57	Top G. nephentes	4.37	4.97	0.6	PL1b	Pulleniatina praecursor	300	355	0.628	-1.324	85.3937	23.4267	2.6676	0	0	0	1	1	10.0975	162.866		18.3	22.78	27.25		21.7342	20.7062	19.7101	18.6401	17.2147		0			27.1081	25.1544	23.6555
126	4.5	872	C	3	5	116	118	24.54	24.54	872C-3H-5-W 116/118 cm	Base G. tumida	5.57	Top G. nephentes	4.37	4.97	0.6	PL1b	Pulleniatina primalis	300	355	0.914	-1.371	81.7665	23.6578	2.27036	0	0	0	1	1	10.0975	162.866		18.49	22.97	27.44		19.2706	18.1772	17.1405	15.8509	14.4984		1			24.0843	22.4177	21.0586
167	4.5	872	C	3	5	116	118	24.54	24.54	872C-3H-5-W 116/118 cm	Base G. tumida	5.57	Top G. nephentes	4.37	4.97	0.6	PL1b	Sphaeroidinellopsis kochi	300	355	1.367	-1.425	77.5989	23.9234	9.18403	0	0	1	0	0	10.0975	162.866		18.71	23.19	27.66		43.7681	41.7012	39.8778	38.4713	37.0163		1			NaN	NaN	NaN
119	4.5	872	C	3	5	116	118	24.54	24.54	872C-3H-5-W 116/118 cm	Base G. tumida	5.57	Top G. nephentes	4.37	4.97	0.6	PL1b	Sphaeroidinellopsis paenedehiscens	300	355	1.548	-1.173	97.0474	22.684	2.02215	0	0	0	1	0	10.0975	162.866		17.69	22.16	26.63		17.5898	16.3505	15.169	13.902	12.3636		1			NaN	NaN	NaN
122	4.5	872	C	3	5	116	118	24.54	24.54	872C-3H-5-W 116/118 cm	Base G. tumida	5.57	Top G. nephentes	4.37	4.97	0.6	PL1b	Sphaeroidinellopsis paenedehiscens	300	355	1.539	-1.306	86.7829	23.3382	2.16178	0	0	0	1	0	10.0975	162.866		18.23	22.7	27.17		18.6756	17.4485	16.2952	15.0118	13.4284		1			NaN	NaN	NaN
147	4.5	872	C	3	5	116	118	24.54	24.54	872C-3H-5-W 116/118 cm	Base G. tumida	5.57	Top G. nephentes	4.37	4.97	0.6	PL1b	Trilobatus sacculifer	300	355	1.792	-1.567	66.6399	24.6218	3.11018	0	0	0	0	0	10.0975	162.866		19.29	23.76	28.23		24.282	23.1844	22.2387	21.2489	19.9921		0			26.4641	25.4411	24.5467
105	4.5	1138	A	11	5	130	132	100.01		U1138A-11R-5-W 130/132 cm							PL1	Globigerina bulloides	250	300	-0.317	2.109	40.4	7.945	1.91918	0	0	0	1	0	-53.5517	75.9749		2.37	6.85	11.32		16.8706	15.5867	14.3383	12.966	11.2058		1			NaN	NaN	NaN
104	4.5	1138	A	11	5	130	132	100.01		U1138A-11R-5-W 130/132 cm							PL1	Truncorotalia crassaformis	250	300	0.724	2.747	181.484	5.40107	1.18213	0	0	0	0	0	-53.5517	75.9749		-0.21	4.26	8.74		9.81614	8.19913	6.35255	4.47244	1.99409		0			8.95995	7.25896	5.39193
111	4.5	1138	A	11	5	130	132	100.01		U1138A-11R-5-W 130/132 cm							PL1	Truncorotalia crassaformis	300	355	0.844	2.76	186.55	5.35181	1.27992	0	0	0	0	0	-53.5517	75.9749		-0.27	4.21	8.68		11.1113	9.3588	7.67921	5.84983	3.61316		0			10.2251	8.5144	6.71449
135	4.5	U1338	C	7	4	60	62	56.41	63.21	U1338C-7H-4-W 60/62 cm	Base G. tumida	5.72	Top G. nephentes	4.37	5.045	0.675	PL1	Trilobatus sacculifer	300	355	2.289	-1.446	54.6335	23.7815	2.71697	0	0	0	0	0	2.50781	-117.97		18.79	23.27	27.74		22.0499	21.0458	20.0508	18.9434	17.6853		0			24.1316	23.2323	22.3582
159	4.5	U1482	A	24	6	5	7	219.5	264.26	U1482A 24-6- 5/7 cm	Base G. tumida	5.57	Top G. nephentes	4.37	4.97	0.6	PL1	Dentoglobigerina altispira	300	355	0.857	-1.715	99.9951	25.4525	3.63761	0	0	0	0	0	-15.0552	120.435		19.57	24.04	28.51		26.7785	25.7471	24.8145	23.7928	22.7277		0			25.8383	24.746	23.7826
165	4.5	U1482	A	24	6	5	7	219.5	264.26	U1482A 24-6- 5/7 cm	Base G. tumida	5.57	Top G. nephentes	4.37	4.97	0.6	PL1	Globigerinoides extremus	300	355	1.194	-2.374	40.4	28.34	4.61964	0	0	0	0	0	-15.0552	120.435		22.24	26.71	31.18		30.9041	29.7348	28.726	27.6629	26.5031		0			29.8219	28.6205	27.6805
164	4.5	U1482	A	24	6	5	7	219.5	264.26	U1482A 24-6- 5/7 cm	Base G. tumida	5.57	Top G. nephentes	4.37	4.97	0.6	PL1	Globigerinoides obliquus	300	355	1.534	-2.242	52.3371	27.7616	4.43321	0	0	0	0	0	-15.0552	120.435		21.71	26.18	30.65		30.1712	29.0023	28.0671	26.994	25.9373		0			29.2189	27.9749	26.9881
132	4.5	U1482	A	24	6	5	7	219.5	264.26	U1482A 24-6- 5/7 cm	Base G. tumida	5.57	Top G. nephentes	4.37	4.97	0.6	PL1	Globorotalia tumida	300	355	1.314	-1.028	162.197	22.4009	2.61444	0	0	0	0	0	-15.0552	120.435		16.78	21.25	25.73		21.7096	20.4333	19.423	18.3125	16.998		0			20.6726	19.4872	18.3703
108	4.5	U1482	A	24	6	5	7	219.5	264.26	U1482A 24-6- 5/7 cm	Base G. tumida	5.57	Top G. nephentes	4.37	4.97	0.6	PL1	Neogloboquadrina acostaensis	250	300	0.286	-1.645	106.325	25.1458	2.37491	0	0	0	1	1	-15.0552	120.435		19.28	23.76	28.23		19.9424	18.887	17.835	16.6002	15.2369		1			25.05	23.1665	21.7458
139	4.5	U1482	A	24	6	5	7	219.5	264.26	U1482A 24-6- 5/7 cm	Base G. tumida	5.57	Top G. nephentes	4.37	4.97	0.6	PL1	Pulleniatina praecursor	300	355	0.633	-1.51	118.534	24.5543	2.92364	0	0	0	1	1	-15.0552	120.435		18.74	23.21	27.68		23.2359	22.1986	21.237	20.1644	18.9186		0			28.9145	26.8163	25.1498
148	4.5	U1482	A	24	6	5	7	219.5	264.26	U1482A 24-6- 5/7 cm	Base G. tumida	5.57	Top G. nephentes	4.37	4.97	0.6	PL1	Sphaeroidinellopsis kochi	300	355	1.337	-2.202	55.9544	27.5864	3.11043	0	0	0	0	0	-15.0552	120.435		21.54	26.02	30.49		24.2905	23.2689	22.2256	21.2724	20.0091		0			NaN	NaN	NaN
130	4.5	U1482	A	24	6	5	7	219.5	264.26	U1482A 24-6- 5/7 cm	Base G. tumida	5.57	Top G. nephentes	4.37	4.97	0.6	PL1	Sphaeroidinellopsis paenedehiscens	300	355	1.071	-1.767	95.2926	25.6804	2.48494	0	0	0	1	0	-15.0552	120.435		19.78	24.25	28.72		20.7683	19.6449	18.5308	17.4402	16.1107		1			NaN	NaN	NaN
162	4.5	U1482	A	24	6	5	7	219.5	264.26	U1482A 24-6- 5/7 cm	Base G. tumida	5.57	Top G. nephentes	4.37	4.97	0.6	PL1	Trilobatus sacculifer	300	355	1.804	-2.149	60.7473	27.3541	4.1427	0	0	0	0	0	-15.0552	120.435		21.33	25.8	30.27		28.9033	27.9135	26.9346	25.9915	24.9043		0			31.44	30.1411	29.1962
154	4.5	U1489	B	12	1	5	7	100.75	108.62	U1489B 12-1-5/7 cm	Base G. tumida	5.57	Top G. nephentes	4.37	4.97	0.6	PL1	Dentoglobigerina altispira	300	355	1.371	-1.322	83.3117	26.2316	3.40449	0	0	0	0	0	2.11962	141.028		18.28	22.76	27.23		25.6966	24.7028	23.7416	22.7278	21.5148		0			24.8109	23.6757	22.6933
129	4.5	U1489	B	12	1	5	7	100.75	108.62	U1489B 12-1-5/7 cm	Base G. tumida	5.57	Top G. nephentes	4.37	4.97	0.6	PL1	Globorotalia tumida	300	355	1.51	-1.139	96.5767	25.3332	2.45014	0	0	0	0	0	2.11962	141.028		17.54	22.01	26.49		20.5506	19.4245	18.318	17.1979	15.7911		0			19.6517	18.4757	17.3064
113	4.5	U1489	B	12	1	5	7	100.75	108.62	U1489B 12-1-5/7 cm	Base G. tumida	5.57	Top G. nephentes	4.37	4.97	0.6	PL1	Sphaeroidinellopsis paenedehiscens	300	355	1.539	-1.639	60.3337	27.7879	1.47568	0	0	0	1	0	2.11962	141.028		19.57	24.04	28.51		13.0143	11.4536	9.92539	8.34826	6.28237		1			NaN	NaN	NaN
142	4.5	U1489	B	12	1	5	7	100.75	108.62	U1489B 12-1-5/7 cm	Base G. tumida	5.57	Top G. nephentes	4.37	4.97	0.6	PL1	Trilobatus sacculifer	300	355	1.732	-1.678	57.5067	27.9794	2.96528	0	0	0	0	0	2.11962	141.028		19.73	24.2	28.67		23.4497	22.4451	21.4942	20.4473	19.1339		0			25.6228	24.6657	23.7854
157	4.5	U1490	A	10	2	5	7	81.76	91.18	U1490A-10H-2-W 5/7 cm	Base G. tumida	5.57	Top G. nephentes	4.37	4.97	0.6	PL1	Dentoglobigerina altispira	300	355	1.521	-1.088	72.7978	26.5793	3.49738	0	0	0	0	0	5.81582	142.654		17.35	21.82	26.29		26.0766	25.1199	24.1499	23.1458	21.956		0			25.1527	24.0525	23.1262
161	4.5	U1490	A	10	2	5	7	81.76	91.18	U1490A-10H-2-W 5/7 cm	Base G. tumida	5.57	Top G. nephentes	4.37	4.97	0.6	PL1	Globigerinoides obliquus	300	355	1.909	-1.465	44.1265	28.3897	3.80611	0	0	0	0	0	5.81582	142.654		18.88	23.35	27.82		27.5674	26.4679	25.5629	24.5409	23.4182		0			26.5519	25.526	24.5145
137	4.5	U1490	A	10	2	5	7	81.76	91.18	U1490A-10H-2-W 5/7 cm	Base G. tumida	5.57	Top G. nephentes	4.37	4.97	0.6	PL1	Globorotalia plesiotumida	300	355	1.579	-1.118	70.5162	26.7234	2.82966	0	0	0	0	0	5.81582	142.654		17.47	21.94	26.41		22.7083	21.6776	20.6997	19.6246	18.3155		0			21.8141	20.6826	19.6422
128	4.5	U1490	A	10	2	5	7	81.76	91.18	U1490A-10H-2-W 5/7 cm	Base G. tumida	5.57	Top G. nephentes	4.37	4.97	0.6	PL1	Globigerinella siphonifera	300	355	1.562	-1.1	71.8852	26.637	2.36967	0	0	0	1	0	5.81582	142.654		17.4	21.87	26.34		20.1247	18.8708	17.7569	16.5894	14.9928		0			NaN	NaN	NaN
146	4.5	U1490	A	10	2	5	7	81.76	91.18	U1490A-10H-2-W 5/7 cm	Base G. tumida	5.57	Top G. nephentes	4.37	4.97	0.6	PL1	Globorotalia tumida	300	355	1.441	-1.065	74.547	26.4689	3.08802	0	0	0	0	0	5.81582	142.654		17.26	21.73	26.2		24.1835	23.0843	22.1002	21.1072	19.858		0			23.1664	22.0786	21.1043
109	4.5	U1490	A	10	2	5	7	81.76	91.18	U1490A-10H-2-W 5/7 cm	Base G. tumida	5.57	Top G. nephentes	4.37	4.97	0.6	PL1	Neogloboquadrina humerosa	250	300	0.86	-1.213	63.2914	27.1796	2.48797	0	0	0	1	1	5.81582	142.654		17.86	22.33	26.8		20.7021	19.5982	18.5314	17.441	16.0227		0			25.6374	24.0615	22.5171
136	4.5	U1490	A	10	2	5	7	81.76	91.18	U1490A-10H-2-W 5/7 cm	Base G. tumida	5.57	Top G. nephentes	4.37	4.97	0.6	PL1	Pulleniatina primalis	300	355	0.829	-1.228	62.1506	27.2516	2.79577	0	0	0	1	1	5.81582	142.654		17.92	22.39	26.86		22.4902	21.479	20.4633	19.4389	18.061		0			27.954	26.0409	24.4631
141	4.5	U1490	A	10	2	5	7	81.76	91.18	U1490A-10H-2-W 5/7 cm	Base G. tumida	5.57	Top G. nephentes	4.37	4.97	0.6	PL1	Sphaeroidinellopsis kochi	300	355	1.943	-1.359	52.1879	27.8807	2.92948	0	0	0	0	0	5.81582	142.654		18.45	22.92	27.39		23.2374	22.2248	21.2955	20.2172	18.9361		0			NaN	NaN	NaN
133	4.5	U1490	A	10	2	5	7	81.76	91.18	U1490A-10H-2-W 5/7 cm	Base G. tumida	5.57	Top G. nephentes	4.37	4.97	0.6	PL1	Sphaeroidinellopsis paenedehiscens	300	355	1.788	-1.378	50.743	27.9719	2.65671	0	0	0	1	0	5.81582	142.654		18.53	23	27.47		21.8089	20.6513	19.6881	18.5526	17.1602		0			NaN	NaN	NaN
155	4.5	U1490	A	10	2	5	7	81.76	91.18	U1490A-10H-2-W 5/7 cm	Base G. tumida	5.57	Top G. nephentes	4.37	4.97	0.6	PL1	Trilobatus sacculifer	300	355	1.982	-1.364	51.8077	27.9047	3.43341	0	0	0	0	0	5.81582	142.654		18.47	22.94	27.41		25.8399	24.7913	23.8856	22.9304	21.6675		0			28.1275	27.0414	26.156
93	2.5	242	Z	2	3	3	5	55.04		242Z-2R-3-W 3/5 cm	Top D. altispira	3.47	Top M. pseudomiocenica	2.3	2.885	0.585	PL5	Globigerinoides elongatus	300	355	1.275	-1.779	40.4	28.392	3.46228	0	0	0	0	0	-15.8442	41.8205		20.65	25.12	29.59		24.9364	23.9728	23.0624	22.1203	21.0013		0			24.1819	23.1879	22.24
95	2.5	242	Z	2	3	3	5	55.04		242Z-2R-3-W 3/5 cm	Top D. altispira	3.47	Top M. pseudomiocenica	2.3	2.885	0.585	PL5	Globigerinoides ruber	300	355	1.793	-1.727	50.0152	28.1274	3.58303	0	0	0	0	0	-15.8442	41.8205		20.43	24.91	29.38		25.4424	24.5224	23.6428	22.7253	21.5941		0			24.8058	23.7565	22.8052
52	2.5	242	Z	2	3	3	5	55.04		242Z-2R-3-W 3/5 cm	Top D. altispira	3.47	Top M. pseudomiocenica	2.3	2.885	0.585	PL5	Hirsutella scitula	300	355	0.359	2.207	603.743	9.52363	1.71563	0	0	0	0	0	-15.8442	41.8205		4.48	8.95	13.43		14.2785	12.961	11.5414	10.0908	8.14521		0			13.6879	12.2871	10.7649
65	2.5	242	Z	2	3	3	5	55.04		242Z-2R-3-W 3/5 cm	Top D. altispira	3.47	Top M. pseudomiocenica	2.3	2.885	0.585	PL5	Neogloboquadrina humerosa	300	355	0.679	-1.04	152.18	24.678	1.97886	0	0	0	1	1	-15.8442	41.8205		17.65	22.12	26.59		16.4547	15.2271	13.9335	12.5591	10.6831		1			20.4783	19.0669	17.8991
103	2.5	242	Z	2	3	3	5	55.04		242Z-2R-3-W 3/5 cm	Top D. altispira	3.47	Top M. pseudomiocenica	2.3	2.885	0.585	PL5	Orbulina universa	300	355	1.407	-1.354	118.986	26.2291	4.81	0	0	0	1	1	-15.8442	41.8205		18.92	23.39	27.86		30.6372	29.3978	28.4525	27.4617	26.453		1			17.0531	16.0503	15.0053
71	2.5	242	Z	2	3	3	5	55.04		242Z-2R-3-W 3/5 cm	Top D. altispira	3.47	Top M. pseudomiocenica	2.3	2.885	0.585	PL5	Pulleniatina praecursor	300	355	0.379	-0.925	162.751	24.1129	2.25265	0	0	0	1	1	-15.8442	41.8205		17.18	21.65	26.13		18.3302	17.2016	16.0144	14.8633	13.2765		1			22.9814	21.2457	20.0126
69	2.5	242	Z	2	3	3	5	55.04		242Z-2R-3-W 3/5 cm	Top D. altispira	3.47	Top M. pseudomiocenica	2.3	2.885	0.585	PL5	Pulleniatina primalis	300	355	0.434	-0.906	164.497	24.0195	2.15098	0	0	0	1	1	-15.8442	41.8205		17.1	21.58	26.05		17.8362	16.4552	15.2848	13.9739	12.3354		1			22.0702	20.4988	19.2732
58	2.5	242	Z	2	3	3	5	55.04		242Z-2R-3-W 3/5 cm	Top D. altispira	3.47	Top M. pseudomiocenica	2.3	2.885	0.585	PL5	Sphaerodinella dehiscens	300	355	1.236	-0.984	157.327	24.4028	1.77416	0	0	0	1	0	-15.8442	41.8205		17.42	21.89	26.36		14.8505	13.4626	12.0908	10.7099	8.94384		1			NaN	NaN	NaN
89	2.5	242	Z	2	3	3	5	55.04		242Z-2R-3-W 3/5 cm	Top D. altispira	3.47	Top M. pseudomiocenica	2.3	2.885	0.585	PL5	Trilobatus sacculifer	300	355	1.917	-1.645	65.1776	27.71	3.20864	0	0	0	0	0	-15.8442	41.8205		20.1	24.57	29.04		23.666	22.7548	21.8565	20.8489	19.5835		0			24.9924	24.0687	23.1768
55	2.5	242	Z	2	3	3	5	55.04		242Z-2R-3-W 3/5 cm	Top D. altispira	3.47	Top M. pseudomiocenica	2.3	2.885	0.585	PL5	Truncorotalia tosaensis	300	355	0.825	0.445	312.869	17.503	1.75193	0	0	0	0	0	-15.8442	41.8205		11.62	16.1	20.57		14.6922	13.3799	11.9106	10.5088	8.68652		0			14.0635	12.5502	11.067
46	2.5	516	Z	3	3	35	39	10.25		516Z-3H-3-W 35-39 cm	Top S. seminulina	3.16	Top M. exilis	2.09	2.625	0.535	PL4-PL6	Globigerina bulloides	250	300	-0.165	0.952	187.848	19.9855	3.97315	0	0	0	1	0	-30.2765	-35.2853		9.11	13.59	18.06		27.2815	26.2463	25.3659	24.4108	23.2927		1			NaN	NaN	NaN
92	2.5	516	Z	3	3	35	39	10.25		516Z-3H-3-W 35-39 cm	Top S. seminulina	3.16	Top M. exilis	2.09	2.625	0.535	PL4-PL6	Globigerinoides elongatus	300	355	1.417	0.472	115.691	22.348	3.37433	0	1	0	0	0	-30.2765	-35.2853		11.06	15.53	20		24.509	23.5528	22.7026	21.7025	20.5312		1			NaN	NaN	NaN
50	2.5	516	Z	3	3	35	39	10.25		516Z-3H-3-W 35-39 cm	Top S. seminulina	3.16	Top M. exilis	2.09	2.625	0.535	PL4-PL6	Globoconella inflata	300	355	1.295	1.462	262.943	17.4506	1.59989	0	0	0	0	0	-30.2765	-35.2853		7.04	11.52	15.99		13.3364	11.9351	10.4228	8.8153	6.88604		0			NaN	NaN	NaN
54	2.5	516	Z	3	3	35	39	10.25		516Z-3H-3-W 35-39 cm	Top S. seminulina	3.16	Top M. exilis	2.09	2.625	0.535	PL4-PL6	Globoconella puncticulata	300	355	1.307	1.697	297.916	16.2867	1.72784	0	0	0	0	0	-30.2765	-35.2853		6.09	10.56	15.04		14.421	13.0715	11.6195	10.1971	8.38809		0			NaN	NaN	NaN
84	2.5	516	Z	3	3	35	39	10.25		516Z-3H-3-W 35-39 cm	Top S. seminulina	3.16	Top M. exilis	2.09	2.625	0.535	PL4-PL6	Globigerinella siphonifera	300	355	1.179	1.176	220.543	18.869	2.87741	0	0	0	1	0	-30.2765	-35.2853		8.2	12.68	17.15		22.1317	21.0383	20.0631	18.9976	17.7757		1			NaN	NaN	NaN
44	2.5	516	Z	3	3	35	39	10.25		516Z-3H-3-W 35-39 cm	Top S. seminulina	3.16	Top M. exilis	2.09	2.625	0.535	PL4-PL6	Hirsutella scitula	250	300	0.593	2.773	491.991	10.9748	1.83456	0	1	0	0	0	-30.2765	-35.2853		1.73	6.2	10.67		15.2633	13.9944	12.6508	11.2088	9.43589		1			NaN	NaN	NaN
57	2.5	516	Z	3	3	35	39	10.25		516Z-3H-3-W 35-39 cm	Top S. seminulina	3.16	Top M. exilis	2.09	2.625	0.535	PL4-PL6	Truncorotalia crassaformis	300	355	1.335	1.61	284.968	16.7176	1.76091	0	0	0	0	0	-30.2765	-35.2853		6.44	10.92	15.39		14.8084	13.3633	11.9755	10.5325	8.57117		0			NaN	NaN	NaN
86	2.5	516	Z	3	3	35	39	10.25		516Z-3H-3-W 35-39 cm	Top S. seminulina	3.16	Top M. exilis	2.09	2.625	0.535	PL4-PL6	Trilobatus sacculifer	300	355	1.902	0.242	74.9455	23.3914	2.97591	0	0	0	0	0	-30.2765	-35.2853		11.99	16.47	20.94		22.6395	21.5413	20.5952	19.6086	18.3764		0			NaN	NaN	NaN
73	2.5	516	Z	3	3	35	39	10.25		516Z-3H-3-W 35-39 cm	Top S. seminulina	3.16	Top M. exilis	2.09	2.625	0.535	PL4-PL6	Truncorotalia viola	300	355	1.015	1.039	200.546	19.5519	2.31412	0	0	0	0	0	-30.2765	-35.2853		8.76	13.23	17.71		18.7061	17.5754	16.4847	15.3073	13.8655		0			NaN	NaN	NaN
97	2.5	872	A	2	2	120	121	10.2	10.2	872A-2H-2-W 120/121 cm	Top D. altispira	3.47	Top G. extremus	1.98	2.725	0.745	PL5-PL6	Globigerinoides elongatus	300	355	0.99	-1.697	62.6032	26.322	3.69689	0	0	0	0	0	10.0975	162.866		20.6	25.08	29.55		26.0352	25.0394	24.1792	23.1588	22.0848		0			25.1323	24.2366	23.3273
51	2.5	872	A	2	2	120	121	10.2	10.2	872A-2H-2-W 120/121 cm	Top D. altispira	3.47	Top G. extremus	1.98	2.725	0.745	PL5-PL6	Globorotaloides hexagonus	300	355	-0.072	2.517	814.984	6.73748	1.65561	0	0	0	0	0	10.0975	162.866		3.51	7.99	12.46		13.9927	12.5074	10.9791	9.42729	7.5969		0			13.2715	11.7615	10.194
96	2.5	872	A	2	2	120	121	10.2	10.2	872A-2H-2-W 120/121 cm	Top D. altispira	3.47	Top G. extremus	1.98	2.725	0.745	PL5-PL6	Globigerinoides ruber	300	355	1.731	-1.842	52.2512	27.0591	3.59461	0	0	0	0	0	10.0975	162.866		21.19	25.66	30.13		25.5169	24.6377	23.6675	22.7381	21.7077		0			24.7357	23.7656	22.8698
63	2.5	872	A	2	2	120	121	10.2	10.2	872A-2H-2-W 120/121 cm	Top D. altispira	3.47	Top G. extremus	1.98	2.725	0.745	PL5-PL6	Globigerinella siphonifera	300	355	1.181	-1.158	101.084	23.582	1.96858	0	0	0	1	0	10.0975	162.866		18.42	22.89	27.36		16.3218	15.1525	13.8235	12.5117	10.9647		1			NaN	NaN	NaN
62	2.5	872	A	2	2	120	121	10.2	10.2	872A-2H-2-W 120/121 cm	Top D. altispira	3.47	Top G. extremus	1.98	2.725	0.745	PL5-PL6	Globorotalia tumida	300	355	1.807	-0.4	182.345	19.7595	1.95524	0	0	0	0	0	10.0975	162.866		15.34	19.82	24.29		16.2394	15.0662	13.6968	12.3917	10.7663		1			15.5636	14.2911	12.8728
47	2.5	872	A	2	2	120	121	10.2	10.2	872A-2H-2-W 120/121 cm	Top D. altispira	3.47	Top G. extremus	1.98	2.725	0.745	PL5-PL6	Hirsutella scitula	300	355	-0.028	2.724	923.259	5.89307	1.35947	0	0	0	0	0	10.0975	162.866		2.67	7.15	11.62		11.1355	9.35752	7.72723	6.00113	3.62211		0			10.4626	8.69935	6.98958
59	2.5	872	A	2	2	120	121	10.2	10.2	872A-2H-2-W 120/121 cm	Top D. altispira	3.47	Top G. extremus	1.98	2.725	0.745	PL5-PL6	Neogloboquadrina humerosa	300	355	1.343	-1.083	106.439	23.2008	1.77581	0	0	0	1	1	10.0975	162.866		18.11	22.59	27.06		14.8671	13.4877	12.0806	10.6872	8.81348		1			18.5013	17.2118	16.1243
67	2.5	872	A	2	2	120	121	10.2	10.2	872A-2H-2-W 120/121 cm	Top D. altispira	3.47	Top G. extremus	1.98	2.725	0.745	PL5-PL6	Pulleniatina obliquiloculata	300	355	0.864	-0.805	126.286	21.7876	2.00834	0	0	0	1	1	10.0975	162.866		16.99	21.46	25.93		16.6109	15.4215	14.1367	12.8319	11.1606		1			20.7777	19.3474	18.1343
68	2.5	872	A	2	2	120	121	10.2	10.2	872A-2H-2-W 120/121 cm	Top D. altispira	3.47	Top G. extremus	1.98	2.725	0.745	PL5-PL6	Pulleniatina praecursor	300	355	0.973	-1.062	107.938	23.094	2.14207	0	0	0	1	1	10.0975	162.866		18.03	22.5	26.97		17.6138	16.3974	15.2139	13.9675	12.164		1			21.8193	20.3568	19.2227
61	2.5	872	A	2	2	120	121	10.2	10.2	872A-2H-2-W 120/121 cm	Top D. altispira	3.47	Top G. extremus	1.98	2.725	0.745	PL5-PL6	Pulleniatina primalis	300	355	0.909	-0.747	133.207	21.4959	1.88496	0	0	0	1	1	10.0975	162.866		16.75	21.22	25.69		15.7895	14.4278	13.1048	11.7432	9.78001		1			19.4551	18.2156	17.1191
56	2.5	872	A	2	2	120	121	10.2	10.2	872A-2H-2-W 120/121 cm	Top D. altispira	3.47	Top G. extremus	1.98	2.725	0.745	PL5-PL6	Sphaerodinella dehiscens	300	355	1.434	-0.956	115.506	22.5552	1.75578	0	0	0	1	0	10.0975	162.866		17.6	22.07	26.54		14.7351	13.3676	11.9513	10.5177	8.6686		1			NaN	NaN	NaN
60	2.5	872	A	2	2	120	121	10.2	10.2	872A-2H-2-W 120/121 cm	Top D. altispira	3.47	Top G. extremus	1.98	2.725	0.745	PL5-PL6	Truncorotalia cf. tosaensis	300	355	0.826	0.788	369.81	14.1007	1.7917	0	0	0	0	0	10.0975	162.866		10.52	15	19.47		14.8863	13.6892	12.2493	10.8379	9.00791		0			14.2985	12.9467	11.4544
48	2.5	872	A	2	2	120	121	10.2	10.2	872A-2H-2-W 120/121 cm	Top D. altispira	3.47	Top G. extremus	1.98	2.725	0.745	PL5-PL6	Truncorotalia crassaformis	300	355	0.609	1.829	587.583	9.59456	1.409	0	0	0	0	0	10.0975	162.866		6.3	10.78	15.25		11.3962	9.95605	8.33404	6.72052	4.64797		0			10.8189	9.33236	7.51787
88	2.5	872	A	2	2	120	121	10.2	10.2	872A-2H-2-W 120/121 cm	Top D. altispira	3.47	Top G. extremus	1.98	2.725	0.745	PL5-PL6	Trilobatus sacculifer	300	355	1.742	-1.441	80.8799	25.0207	3.07338	0	0	0	0	0	10.0975	162.866		19.56	24.04	28.51		22.9799	22.075	21.1242	20.1331	18.9288		0			24.1309	23.3529	22.4783
53	2.5	1138	A	8	3	130	132	68.61		U1138A-8R-3-W 130/132 cm	Not enough biohorizons							Globigerina bulloides	300	355	-0.465	3.657	75.2811	6.34737	1.71772	0	0	0	1	0	-53.5517	75.9749		-3.12	1.36	5.83		14.4075	13.0013	11.581	10.1138	8.2684		1			NaN	NaN	NaN
43	2.5	1138	A	8	3	130	132	68.61		U1138A-8R-3-W 130/132 cm	Not enough biohorizons							Neogloboquadrina pachyderma	250	300	0.604	3.493	51.8364	6.99909	0.953502	0	0	0	1	1	-53.5517	75.9749		-2.45	2.02	6.5		5.98927	4.14205	1.96724	-0.36287	-3.02238		0			8.01377	6.97121	5.95807
87	2.5	U1338	C	4	4	60	62	27.91	30.77	U1338C-4H-4-W 60/62 cm				2.3				Globigerinoides ruber	300	355	2.053	-1.634	40.4	25.399	3.02753	0	0	0	0	0	2.50781	-117.97		20.34	24.81	29.28		22.9246	21.8659	20.8434	19.9412	18.6087		0			22.0537	21.0372	20.0178
49	2.5	U1338	C	4	4	60	62	27.91	30.77	U1338C-4H-4-W 60/62 cm				2.3				Globorotalia tumida	300	355	1.584	0.099	228.272	16.7619	1.49862	1	0	0	0	0	2.50781	-117.97		13.31	17.78	22.25		12.4457	10.96	9.36066	7.64998	5.56858		1			NaN	NaN	NaN
75	2.5	U1338	C	4	4	60	62	27.91	30.77	U1338C-4H-4-W 60/62 cm				2.3				Menardella pertenuis	300	355	1.778	-0.973	95.4776	22.0943	2.364	1	0	0	0	0	2.50781	-117.97		17.66	22.13	26.6		19.0418	17.9244	16.8592	15.611	14.1821		1			NaN	NaN	NaN
81	2.5	U1338	C	4	4	60	62	27.91	30.77	U1338C-4H-4-W 60/62 cm				2.3				Pulleniatina primalis	300	355	0.819	-0.82	108.226	21.3294	2.53682	0	0	0	1	0	2.50781	-117.97		17.04	21.51	25.98		20.0333	18.9921	17.9767	16.8651	15.5184		0			25.0771	23.2745	21.9381
82	2.5	U1338	C	4	4	60	62	27.91	30.77	U1338C-4H-4-W 60/62 cm				2.3				Trilobatus sacculifer	300	355	1.996	-1.202	76.3962	23.2392	2.61401	0	0	0	0	0	2.50781	-117.97		18.59	23.06	27.53		20.6293	19.5164	18.4626	17.3532	16.1326		0			21.6759	20.8032	19.8126
101	2.5	U1482	A	11	2	105	107	90.96	119.75	U1482A 11-2-105/107 cm	Top G. fistulosus	1.88	Top T. tosaensis	0.61	1.245	0.635	PT1a	Globigerinoides elongatus	300	355	0.819	-2.107	40.4	27.771	4.60269	0	0	0	0	0	-15.0552	120.435		21.96	26.44	30.91		29.7923	28.656	27.7189	26.8065	25.6997		0			28.9704	27.8017	26.9133
102	2.5	U1482	A	11	2	105	107	90.96	119.75	U1482A 11-2-105/107 cm	Top G. fistulosus	1.88	Top T. tosaensis	0.61	1.245	0.635	PT1a	Globigerinoides ruber	300	355	1.169	-2.033	49.9271	27.4228	4.71107	0	0	0	0	0	-15.0552	120.435		21.66	26.14	30.61		30.1634	29.0855	28.0632	27.1863	26.1305		0			29.4753	28.2025	27.2683
99	2.5	U1482	A	11	2	105	107	90.96	119.75	U1482A 11-2-105/107 cm	Top G. fistulosus	1.88	Top T. tosaensis	0.61	1.245	0.635	PT1a	Globigerinella siphonifera	300	355	0.741	-1.477	121.509	24.8066	3.88429	0	0	0	1	0	-15.0552	120.435		19.41	23.88	28.35		26.9088	25.8398	25.0058	23.9568	22.931		0			NaN	NaN	NaN
80	2.5	U1482	A	11	2	105	107	90.96	119.75	U1482A 11-2-105/107 cm	Top G. fistulosus	1.88	Top T. tosaensis	0.61	1.245	0.635	PT1a	Globorotalia tumida	300	355	1.116	-0.984	170.707	22.3984	2.49412	0	0	0	0	0	-15.0552	120.435		17.41	21.88	26.35		19.8465	18.7163	17.7569	16.6226	15.2547		0			19.289	17.9928	16.8947
76	2.5	U1482	A	11	2	105	107	90.96	119.75	U1482A 11-2-105/107 cm	Top G. fistulosus	1.88	Top T. tosaensis	0.61	1.245	0.635	PT1a	Neogloboquadrina humerosa	300	355	0.465	-1.029	166.354	22.6191	2.40188	0	0	0	1	1	-15.0552	120.435		17.59	22.06	26.53		19.2322	18.0997	17.1041	15.9727	14.4404		1			24.075	22.3875	21.0536
72	2.5	U1482	A	11	2	105	107	90.96	119.75	U1482A 11-2-105/107 cm	Top G. fistulosus	1.88	Top T. tosaensis	0.61	1.245	0.635	PT1a	Pulleniatina obliquiloculata	300	355	0.404	-0.941	174.866	22.1876	2.27972	0	0	0	1	1	-15.0552	120.435		17.23	21.71	26.18		18.5074	17.2984	16.183	15.0572	13.6822		1			23.2082	21.4947	20.2374
79	2.5	U1482	A	11	2	105	107	90.96	119.75	U1482A 11-2-105/107 cm	Top G. fistulosus	1.88	Top T. tosaensis	0.61	1.245	0.635	PT1a	Sphaerodinella dehiscens	300	355	0.961	-1.49	119.836	24.8678	2.46668	0	0	0	1	0	-15.0552	120.435		19.46	23.93	28.4		19.8221	18.5808	17.5775	16.4487	15.1412		1			NaN	NaN	NaN
70	2.5	U1482	A	11	2	105	107	90.96	119.75	U1482A 11-2-105/107 cm	Top G. fistulosus	1.88	Top T. tosaensis	0.61	1.245	0.635	PT1a	Truncorotalia crassaformis	300	355	0.39	0.683	364.424	14.3587	2.24706	0	0	0	0	0	-15.0552	120.435		10.65	15.12	19.59		18.1959	17.1157	16.0255	14.8028	13.1485		0			17.6204	16.4712	15.1415
100	2.5	U1482	A	11	2	105	107	90.96	119.75	U1482A 11-2-105/107 cm	Top G. fistulosus	1.88	Top T. tosaensis	0.61	1.245	0.635	PT1a	Trilobatus sacculifer	300	355	1.479	-1.767	84.1733	26.1712	3.9348	0	0	0	0	0	-15.0552	120.435		20.58	25.06	29.53		27.0866	26.0825	25.2298	24.2552	23.1156		0			28.5145	27.3676	26.5081
90	2.5	U1482	A	11	2	105	107	90.96	119.75	U1482A 11-2-105/107 cm	Top G. fistulosus	1.88	Top T. tosaensis	0.61	1.245	0.635	PT1a	Truncorotalia truncatulinoides	300	355	0.168	-0.681	200.013	20.9126	3.28796	0	0	0	0	0	-15.0552	120.435		16.18	20.65	25.12		24.1706	23.1775	22.2784	21.2593	20.049		0			23.3118	22.3185	21.4047
64	2.5	U1489	B	6	6	85	87	52.06	55.14	U1489B 6-6-85/87 cm	Top D. altispira	3.13	Top G. extremus	1.98	2.555	0.575	PL5-PL6	Globorotalia tumida	300	355	1.543	-0.803	98.5298	25.5853	1.97485	0	0	0	0	0	2.11962	141.028		16.96	21.44	25.91		16.457	15.0927	13.8718	12.5857	10.8065		1			15.7286	14.3772	13.0812
83	2.5	U1489	B	6	6	85	87	52.06	55.14	U1489B 6-6-85/87 cm	Top D. altispira	3.13	Top G. extremus	1.98	2.555	0.575	PL5-PL6	Trilobatus sacculifer	300	355	1.865	-1.402	62.7806	28.419	2.66843	0	0	0	0	0	2.11962	141.028		19.39	23.86	28.34		20.8688	19.8009	18.8266	17.7335	16.2791		1			21.9267	21.1177	20.1929
98	2.5	U1490	A	4	7	35	37	32.25	35.12	U1490A-4H-7-W 35/37 cm	Top D. altispira	3.47	Top M. pseudomiocenica	2.3	2.885	0.585	PL5	Globigerinoides elongatus	300	355	1.327	-1.742	40.4	30.06	3.88158	0	0	0	0	0	5.81582	142.654		20.79	25.26	29.73		26.8391	25.8577	24.9572	24.0334	22.9069		0			26.014	25.0357	24.0878
45	2.5	U1490	A	4	7	35	37	32.25	35.12	U1490A-4H-7-W 35/37 cm	Top D. altispira	3.47	Top M. pseudomiocenica	2.3	2.885	0.585	PL5	Globigerinoides obliquus	250	300	1.015	-1.592	49.4517	29.3651	3.75316	0	0	0	0	0	5.81582	142.654		20.18	24.65	29.12		26.2309	25.2964	24.4334	23.4111	22.2902		0			25.3948	24.4834	23.591
94	2.5	U1490	A	4	7	35	37	32.25	35.12	U1490A-4H-7-W 35/37 cm	Top D. altispira	3.47	Top M. pseudomiocenica	2.3	2.885	0.585	PL5	Globigerinoides ruber	300	355	1.554	-1.566	51.0207	29.2447	3.57712	0	0	0	0	0	5.81582	142.654		20.07	24.55	29.02		25.5218	24.5268	23.6335	22.6138	21.4815		0			24.6352	23.6884	22.8025
74	2.5	U1490	A	4	7	35	37	32.25	35.12	U1490A-4H-7-W 35/37 cm	Top D. altispira	3.47	Top M. pseudomiocenica	2.3	2.885	0.585	PL5	Globorotalia tumida	300	355	1.562	-0.555	112.03	24.5613	2.32198	0	0	0	0	0	5.81582	142.654		15.97	20.45	24.92		18.8236	17.6614	16.5234	15.365	13.9566		0			18.1494	16.9472	15.7007
85	2.5	U1490	A	4	7	35	37	32.25	35.12	U1490A-4H-7-W 35/37 cm	Top D. altispira	3.47	Top M. pseudomiocenica	2.3	2.885	0.585	PL5	Menardella pertenuis	300	355	1.312	-1.03	83.3656	26.7617	2.91323	0	0	0	0	0	5.81582	142.654		17.9	22.37	26.84		22.3134	21.2206	20.2712	19.2667	18.0687		0			21.5425	20.4737	19.4222
77	2.5	U1490	A	4	7	35	37	32.25	35.12	U1490A-4H-7-W 35/37 cm	Top D. altispira	3.47	Top M. pseudomiocenica	2.3	2.885	0.585	PL5	Neogloboquadrina humerosa	300	355	0.944	-1.225	71.5984	27.665	2.40827	0	0	0	1	1	5.81582	142.654		18.69	23.16	27.63		19.427	18.2424	17.1352	16.0028	14.5986		1			24.1808	22.4197	21.1081
78	2.5	U1490	A	4	7	35	37	32.25	35.12	U1490A-4H-7-W 35/37 cm	Top D. altispira	3.47	Top M. pseudomiocenica	2.3	2.885	0.585	PL5	Pulleniatina praecursor	300	355	0.73	-1.084	80.107	27.0118	2.41871	0	0	0	1	1	5.81582	142.654		18.12	22.59	27.06		19.4366	18.244	17.2189	16.0646	14.5712		1			24.1163	22.4335	21.1795
66	2.5	U1490	A	4	7	35	37	32.25	35.12	U1490A-4H-7-W 35/37 cm	Top D. altispira	3.47	Top M. pseudomiocenica	2.3	2.885	0.585	PL5	Sphaerodinella dehiscens	300	355	1.192	-1.231	71.2363	27.6928	1.98304	0	0	0	1	0	5.81582	142.654		18.71	23.19	27.66		16.3828	15.1752	13.9381	12.6431	10.9324		1			NaN	NaN	NaN
91	2.5	U1490	A	4	7	35	37	32.25	35.12	U1490A-4H-7-W 35/37 cm	Top D. altispira	3.47	Top M. pseudomiocenica	2.3	2.885	0.585	PL5	Trilobatus sacculifer	300	355	1.318	-1.409	60.4949	28.5174	3.348	0	0	0	0	0	5.81582	142.654		19.44	23.91	28.38		24.4321	23.4698	22.5774	21.5338	20.4259		0			25.7355	24.756	23.878
40	0	242	Z	1	2	45	47	1.96		242Z-1R-2-W 45/47 cm	Top T. tosaensis	0.61	Base G. calida	0.22	0.415	0.195	PT1b (Holocene)	Globigerina calida	300	355	-0.316	-0.658	248.042	18.8116	5.03411	0	0	0	1	0	-15.8442	41.8205		16	20.47	24.94		30.6755	29.9048	29.2701	28.6321	28.0439		1			NaN	NaN	NaN
35	0	242	Z	1	2	45	47	1.96		242Z-1R-2-W 45/47 cm	Top T. tosaensis	0.61	Base G. calida	0.22	0.415	0.195	PT1b (Holocene)	Globigerinoides elongatus	300	355	1.271	-1.716	89.5524	24.0605	3.97089	0	0	0	0	0	-15.8442	41.8205		20.29	24.76	29.23		26.543	25.9051	25.3973	24.9122	24.3566		0			26.0004	25.4034	24.7697
2	0	242	Z	1	2	45	47	1.96		242Z-1R-2-W 45/47 cm	Top T. tosaensis	0.61	Base G. calida	0.22	0.415	0.195	PT1b (Holocene)	Globorotaloides hexagonus	250	300	0.459	1.477	572.997	8.97595	2.33293	0	0	0	0	0	-15.8442	41.8205		7.34	11.81	16.28		18.4328	17.6027	16.7596	15.8889	14.5892		0			18.0727	17.1534	16.2154
36	0	242	Z	1	2	45	47	1.96		242Z-1R-2-W 45/47 cm	Top T. tosaensis	0.61	Base G. calida	0.22	0.415	0.195	PT1b (Holocene)	Globigerinoides ruber	300	355	1.186	-1.819	40.4	24.578	4.24348	0	0	0	0	0	-15.8442	41.8205		20.71	25.18	29.65		27.6235	27.0013	26.4581	25.9627	25.469		0			27.2313	26.4823	25.8432
42	0	242	Z	1	2	45	47	1.96		242Z-1R-2-W 45/47 cm	Top T. tosaensis	0.61	Base G. calida	0.22	0.415	0.195	PT1b (Holocene)	Globigerinella siphonifera	300	355	0.751	-1.096	194.348	20.9637	5.33169	0	0	0	1	0	-15.8442	41.8205		17.77	22.25	26.72		31.7667	30.8742	30.1578	29.5163	28.928		1			NaN	NaN	NaN
22	0	242	Z	1	2	45	47	1.96		242Z-1R-2-W 45/47 cm	Top T. tosaensis	0.61	Base G. calida	0.22	0.415	0.195	PT1b (Holocene)	Globorotalia tumida	300	355	1.534	-0.422	276.578	17.684	2.56896	0	0	0	0	0	-15.8442	41.8205		15.04	19.51	23.98		19.8596	19.0817	18.3259	17.4977	16.4933		0			19.4267	18.5901	17.7277
25	0	242	Z	1	2	45	47	1.96		242Z-1R-2-W 45/47 cm	Top T. tosaensis	0.61	Base G. calida	0.22	0.415	0.195	PT1b (Holocene)	Globorotalia ungulata	300	355	1.066	-0.997	206.579	20.4696	2.91808	0	0	0	0	0	-15.8442	41.8205		17.37	21.84	26.31		21.6459	21.0459	20.4053	19.749	19.0045		0			21.2848	20.6168	19.7868
8	0	242	Z	1	2	45	47	1.96		242Z-1R-2-W 45/47 cm	Top T. tosaensis	0.61	Base G. calida	0.22	0.415	0.195	PT1b (Holocene)	Hirsutella scitula	300	355	0.305	2.195	757.511	5.90726	1.85277	0	0	0	0	0	-15.8442	41.8205		4.42	8.9	13.37		15.3117	14.1143	12.9724	11.882	10.1353		0			14.7747	13.6211	12.4069
14	0	242	Z	1	2	45	47	1.96		242Z-1R-2-W 45/47 cm	Top T. tosaensis	0.61	Base G. calida	0.22	0.415	0.195	PT1b (Holocene)	Neogloboquadrina humerosa	300	355	1.15	-0.883	220.663	19.9007	2.14742	0	0	0	1	1	-15.8442	41.8205		16.91	21.38	25.85		17.1697	16.2876	15.4216	14.3919	13.2154		1			21.7718	20.4089	19.3349
17	0	242	Z	1	2	45	47	1.96		242Z-1R-2-W 45/47 cm	Top T. tosaensis	0.61	Base G. calida	0.22	0.415	0.195	PT1b (Holocene)	Pulleniatina obliquiloculata	300	355	0.738	-0.605	254.451	18.5584	2.23031	0	0	0	1	1	-15.8442	41.8205		15.78	20.25	24.73		17.7866	16.9772	16.0491	15.0579	13.8236		0			22.464	21.0977	19.9833
19	0	242	Z	1	2	45	47	1.96		242Z-1R-2-W 45/47 cm	Top T. tosaensis	0.61	Base G. calida	0.22	0.415	0.195	PT1b (Holocene)	Truncorotalia crassaformis	300	355	0.528	0.623	419.496	12.7878	2.38	0	0	0	0	0	-15.8442	41.8205		10.8	15.27	19.75		18.7315	17.9354	17.1499	16.1556	15.0976		0			18.3393	17.4885	16.4997
11	0	242	Z	1	2	45	47	1.96		242Z-1R-2-W 45/47 cm	Top T. tosaensis	0.61	Base G. calida	0.22	0.415	0.195	PT1b (Holocene)	Truncorotalia crassaformis	300	355	0.989	0.787	445.135	12.0382	2.09	0	0	0	0	0	-15.8442	41.8205		10.14	14.61	19.08		16.8098	15.9714	14.9923	13.8466	12.3672		0			16.4248	15.5005	14.3895
32	0	242	Z	1	2	45	47	1.96		242Z-1R-2-W 45/47 cm	Top T. tosaensis	0.61	Base G. calida	0.22	0.415	0.195	PT1b (Holocene)	Trilobatus sacculifer	300	355	1.382	-1.366	160.991	22.3112	3.7304	0	0	0	0	0	-15.8442	41.8205		18.87	23.34	27.81		25.5717	24.9076	24.3852	23.8703	23.3282		0			25.4691	25.0321	24.5847
12	0	242	Z	1	2	45	47	1.96		242Z-1R-2-W 45/47 cm	Top T. tosaensis	0.61	Base G. calida	0.22	0.415	0.195	PT1b (Holocene)	Truncorotalia truncatulinoides	300	355	0.784	0.524	404.019	13.2403	2.09613	0	0	0	0	0	-15.8442	41.8205		11.2	15.68	20.15		16.8199	15.9922	15.0635	13.8882	12.3996		0			16.575	15.5669	14.4303
26	0	516	A	1	1	50	52	0.5		516A-1H-1-W 50-52 cm	Top T. tosaensis	0.61	Base G. calida	0.22	0.415	0.195	PT1b (Holocene)	Globigerinoides elongatus	300	355	0.984	0.039	55.7513	19.301	3.17049	0	0	0	0	0	-30.2765	-35.2853		12.7	17.17	21.65		22.9094	22.3428	21.7592	21.2066	20.4617		0			NaN	NaN	NaN
9	0	516	A	1	1	50	52	0.5		516A-1H-1-W 50-52 cm	Top T. tosaensis	0.61	Base G. calida	0.22	0.415	0.195	PT1b (Holocene)	Globoconella inflata	300	355	0.639	1.164	222.508	13.7429	1.9126	0	0	0	0	0	-30.2765	-35.2853		8.14	12.61	17.08		15.5672	14.6744	13.5258	12.3005	10.8642		0			NaN	NaN	NaN
31	0	516	A	1	1	50	52	0.5		516A-1H-1-W 50-52 cm	Top T. tosaensis	0.61	Base G. calida	0.22	0.415	0.195	PT1b (Holocene)	Globigerinoides ruber	300	355	0.804	-0.042	40.4	19.699	3.62463	0	1	0	0	0	-30.2765	-35.2853		13.03	17.5	21.98		25.0857	24.4785	23.9225	23.414	22.8418		1			NaN	NaN	NaN
29	0	516	A	1	1	50	52	0.5		516A-1H-1-W 50-52 cm	Top T. tosaensis	0.61	Base G. calida	0.22	0.415	0.195	PT1b (Holocene)	Globigerinella siphonifera	300	355	1.252	0.908	189.935	15.0111	3.42837	0	0	0	1	0	-30.2765	-35.2853		9.18	13.65	18.12		24.0923	23.5558	23.0315	22.4422	21.9038		1			NaN	NaN	NaN
18	0	516	A	1	1	50	52	0.5		516A-1H-1-W 50-52 cm	Top T. tosaensis	0.61	Base G. calida	0.22	0.415	0.195	PT1b (Holocene)	Hirsutella hirsuta	300	355	0.568	0.979	198.969	14.6594	2.26018	0	0	0	0	0	-30.2765	-35.2853		8.89	13.36	17.84		18.0395	17.1174	16.2951	15.3236	14.128		0			NaN	NaN	NaN
1	0	516	A	1	1	50	52	0.5		516A-1H-1-W 50-52 cm	Top T. tosaensis	0.61	Base G. calida	0.22	0.415	0.195	PT1b (Holocene)	Hirsutella scitula	250	300	0.431	2.67	430.563	6.67406	1.70336	0	0	0	0	0	-30.2765	-35.2853		2.03	6.5	10.98		13.8977	12.8145	11.5728	10.3569	8.4993		0			NaN	NaN	NaN
6	0	516	A	1	1	50	52	0.5		516A-1H-1-W 50-52 cm	Top T. tosaensis	0.61	Base G. calida	0.22	0.415	0.195	PT1b (Holocene)	Neogloboquadrina incompta	300	355	0.059	1.674	283.53	11.3042	1.7849	0	0	0	1	1	-30.2765	-35.2853		6.07	10.54	15.02		14.5993	13.6019	12.3818	11.0561	9.34939		0			18.3512	17.2142	16.3103
41	0	516	A	1	1	50	52	0.5		516A-1H-1-W 50-52 cm	Top T. tosaensis	0.61	Base G. calida	0.22	0.415	0.195	PT1b (Holocene)	Orbulina universa	300	355	2.006	0.668	159.397	16.2001	5.22875	0	0	0	1	1	-30.2765	-35.2853		10.15	14.62	19.1		31.4378	30.5401	29.8457	29.2192	28.6551		1			17.67	16.924	16.1845
27	0	516	A	1	1	50	52	0.5		516A-1H-1-W 50-52 cm	Top T. tosaensis	0.61	Base G. calida	0.22	0.415	0.195	PT1b (Holocene)	Trilobatus sacculifer	300	355	1.284	-0.01	46.4647	19.5417	3.29567	0	1	0	0	0	-30.2765	-35.2853		12.9	17.37	21.85		23.6144	22.9646	22.4112	21.8104	21.1728		1			NaN	NaN	NaN
15	0	516	A	1	1	50	52	0.5		516A-1H-1-W 50-52 cm	Top T. tosaensis	0.61	Base G. calida	0.22	0.415	0.195	PT1b (Holocene)	Truncorotalia truncatulinoides	300	355	0.722	1.426	254.059	12.4855	2.18891	0	0	0	0	0	-30.2765	-35.2853		7.08	11.55	16.02		17.4822	16.6742	15.696	14.8146	13.3011		0			NaN	NaN	NaN
4	0	U1338	B	1	1	3	5	0.04	0.04	U1338B-1H-1-W 3/5 cm								Globorotalia tumida	300	355	1.68	0.875	53.2421	23.0239	1.34673	1	0	0	0	0	2.50781	-117.97		10.02	14.5	18.97		10.5929	9.26514	7.83148	6.11383	3.55943		1			NaN	NaN	NaN
3	0	U1338	B	1	1	3	5	0.04	0.04	U1338B-1H-1-W 3/5 cm								Neogloboquadrina humerosa	300	355	1.289	0.672	40.4	23.99	0.907992	1	0	0	1	1	2.50781	-117.97		10.85	15.32	19.79		5.11894	3.31517	1.30399	-1.104	-3.99038		1			7.08108	6.11053	5.2446
39	0	U1482	A	1	1	7	9	0.08	0.12	U1482A 1-1-7/9 cm	Base G. calida	0.22		0	0.11	0.11	PT1b (Holocene)	Globigerinoides ruber	300	355	1.605	-2.823	40.4	28.813	4.79829	0	0	0	0	0	-15.0552	120.435		24.8	29.27	33.74		29.7633	29.1109	28.4601	27.868	27.3791		0			29.393	28.5173	27.8438
21	0	U1482	A	1	1	7	9	0.08	0.12	U1482A 1-1-7/9 cm	Base G. calida	0.22		0	0.11	0.11	PT1b (Holocene)	Globorotalia tumida	300	355	1.549	-1.099	151.5	21.3321	2.55916	0	0	0	0	0	-15.0552	120.435		17.8	22.28	26.75		19.7659	19.0129	18.3244	17.5053	16.426		0			19.356	18.6002	17.7197
16	0	U1482	A	1	1	7	9	0.08	0.12	U1482A 1-1-7/9 cm	Base G. calida	0.22		0	0.11	0.11	PT1b (Holocene)	Neogloboquadrina humerosa	300	355	1.592	-1.61	113.475	23.5897	2.18965	0	0	0	1	1	-15.0552	120.435		19.88	24.35	28.82		17.5855	16.6901	15.7898	14.7672	13.3952		1			22.0174	20.8187	19.6835
24	0	U1482	A	1	1	7	9	0.08	0.12	U1482A 1-1-7/9 cm	Base G. calida	0.22		0	0.11	0.11	PT1b (Holocene)	Pulleniatina obliquiloculata	300	355	0.887	-1.784	102.992	24.3389	2.60601	0	0	0	1	1	-15.0552	120.435		20.58	25.05	29.52		20.0035	19.2895	18.5871	17.8172	16.9017		1			25.3459	23.713	22.4498
33	0	U1482	A	1	1	7	9	0.08	0.12	U1482A 1-1-7/9 cm	Base G. calida	0.22		0	0.11	0.11	PT1b (Holocene)	Trilobatus sacculifer	300	355	1.472	-2.565	55.9427	27.702	3.77741	0	0	0	0	0	-15.0552	120.435		23.75	28.22	32.69		25.7505	25.1067	24.5989	24.088	23.5496		0			25.7271	25.2214	24.7817
13	0	U1489	B	1	1	5	7	0.06	0.08	U1489B 1-1-5/7 cm	Not enough biohorizons							Globorotalia tumida	300	355	1.905	-0.797	122.566	21.5103	2.09926	0	0	0	0	0	2.11962	141.028		16.8	21.28	25.75		16.9134	15.9974	15.0891	14.0312	12.7084		1			16.612	15.527	14.4838
7	0	U1489	B	1	1	5	7	0.06	0.08	U1489B 1-1-5/7 cm	Not enough biohorizons							Neogloboquadrina humerosa	300	355	1.408	-1.295	87.1997	23.704	1.79493	0	0	0	1	1	2.11962	141.028		18.82	23.3	27.77		14.6299	13.6517	12.5131	11.2393	9.517		1			18.4598	17.3591	16.413
10	0	U1489	B	1	1	5	7	0.06	0.08	U1489B 1-1-5/7 cm	Not enough biohorizons							Pulleniatina obliquiloculata	300	355	1.177	-1.434	77.3284	24.3163	1.96414	0	0	0	1	1	2.11962	141.028		19.39	23.86	28.33		16.0155	15.0614	13.9988	12.8685	11.3147		1			20.1749	18.879	17.8838
30	0	U1489	B	1	1	5	7	0.06	0.08	U1489B 1-1-5/7 cm	Not enough biohorizons							Trilobatus sacculifer	300	355	1.703	-1.954	40.4	26.607	3.58348	0	0	0	0	0	2.11962	141.028		21.5	25.97	30.44		24.9162	24.2542	23.7487	23.1602	22.6065		0			24.8465	24.3581	23.9201
38	0	U1490	A	1	1	5	7	0.06	0.06	U1490A-1H-1-W 5/7 cm	Top T. tosaensis	0.61	Base G. calida	0.22	0.415	0.195	PT1b (Holocene)	Globigerinoides elongatus	300	355	1.523	-2.449	40.4	25.859	4.71359	0	0	0	0	0	5.81582	142.654		23.51	27.98	32.45		29.5555	28.7841	28.1829	27.6109	27.0881		0			29.0749	28.1462	27.5402
37	0	U1490	A	1	1	5	7	0.06	0.06	U1490A-1H-1-W 5/7 cm	Top T. tosaensis	0.61	Base G. calida	0.22	0.415	0.195	PT1b (Holocene)	Globigerinoides ruber	300	355	1.454	-2.33	50.2996	25.3378	4.35484	0	0	0	0	0	5.81582	142.654		23.03	27.5	31.97		28.2894	27.4389	26.8906	26.373	25.8479		0			27.6335	26.9011	26.2803
28	0	U1490	A	1	1	5	7	0.06	0.06	U1490A-1H-1-W 5/7 cm	Top T. tosaensis	0.61	Base G. calida	0.22	0.415	0.195	PT1b (Holocene)	Globigerinella siphonifera	300	355	1.474	-1.885	87.3192	23.3887	3.36177	0	0	0	1	0	5.81582	142.654		21.22	25.69	30.16		23.89	23.2968	22.7132	22.1393	21.4974		0			NaN	NaN	NaN
23	0	U1490	A	1	1	5	7	0.06	0.06	U1490A-1H-1-W 5/7 cm	Top T. tosaensis	0.61	Base G. calida	0.22	0.415	0.195	PT1b (Holocene)	Globorotalia tumida	300	355	1.634	-1.185	157.766	20.2274	2.58918	0	0	0	0	0	5.81582	142.654		18.38	22.85	27.33		19.9478	19.2372	18.4714	17.7195	16.7979		0			19.5433	18.8158	17.9024
5	0	U1490	A	1	1	5	7	0.06	0.06	U1490A-1H-1-W 5/7 cm	Top T. tosaensis	0.61	Base G. calida	0.22	0.415	0.195	PT1b (Holocene)	Neogloboquadrina humerosa	300	355	1.43	-0.966	188.38	19.1713	1.74104	0	0	0	1	1	5.81582	142.654		17.49	21.97	26.44		14.2406	13.1271	12.0043	10.6235	8.9485		1			17.9815	16.8202	15.9232
20	0	U1490	A	1	1	5	7	0.06	0.06	U1490A-1H-1-W 5/7 cm	Top T. tosaensis	0.61	Base G. calida	0.22	0.415	0.195	PT1b (Holocene)	Pulleniatina obliquiloculata	300	355	1.174	-1.358	133.583	21.0616	2.54726	0	0	0	1	1	5.81582	142.654		19.08	23.56	28.03		19.6276	18.945	18.206	17.3889	16.276		1			24.8634	23.4126	22.1212
34	0	U1490	A	1	1	5	7	0.06	0.06	U1490A-1H-1-W 5/7 cm	Top T. tosaensis	0.61	Base G. calida	0.22	0.415	0.195	PT1b (Holocene)	Trilobatus sacculifer	300	355	1.81	-2.31	51.9634	25.2502	3.8584	0	0	0	0	0	5.81582	142.654		22.95	27.42	31.89		26.0214	25.4778	24.9407	24.4198	23.8768		0			26.0628	25.5644	25.1335
[truncated: 5 more columns]
