# Supplementary material for: Exploring macroevolutionary links in multi-species planktonic foraminiferal Mg∕Ca and δ 18 O from 15 Ma to recent
Source: Copernicus journal article supplement (doi:10.5194/bg-22-1095-2025), 2025-02-28
Supplement: Supplementary file 1 [file bg-22-1095-2025-supplement.zip]

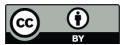

*Supplement of*

**Exploring macroevolutionary links in multi-species planktonic foraminiferal Mg / Ca and  $\delta^{18}\text{O}$  from 15 Ma to recent**

**Flavia Boscolo-Galazzo et al.**

*Correspondence to:* Flavia Boscolo-Galazzo ([flavia@uni-bremen.de](mailto:flavia@uni-bremen.de))

- [bg-22-1095-2025-supplement-title-page.pdf](#)
- [Supplement.pdf](#)
- [Supplementary Table 1.xlsx](#)
- [Supplementary Table 2.xlsx](#)

The copyright of individual parts of the supplement might differ from the article licence.
